# Supplementary material for: Organocatalytic enone-azide [3 + 2]-cycloaddition: synthesis of functionally rich C/N-double vinyl 1,2,3-triazoles
Source: Royal Society of Chemistry journal article supplement (doi:10.1039/d0ob00848f), 2020-01-01
Supplement: d0ob00848f1.pdf [file d0ob00848f1.pdf]

## Supporting Information-I

# Organocatalytic Enone-Azide [3+2]-Cycloaddition: Synthesis of Functionally Rich C/N-Double Vinyl 1,2,3-Triazoles

G. Surendra Reddy, A. Suresh Kumar, and Dhevalapally B. Ramachary\*

*Catalysis Laboratory, School of Chemistry, University of Hyderabad, Central University,  
Prof CR Rao Road, Gachibowli, Hyderabad-500 046, Telangana, India*

E-mail: [ramsc@uohyd.ac.in](mailto:ramsc@uohyd.ac.in) and [ramchary.db@gmail.com](mailto:ramchary.db@gmail.com)

| CONTENTS                                        | Page No |
|-------------------------------------------------|---------|
| 1. General methods                              | S1-2    |
| 2. Materials                                    | S2      |
| 3. General experimental procedures              | S2-3    |
| 4. Crystal structure for <b>4aj</b> [Figure S1] | S3      |
| 5. Crystal structure for <b>6ac</b> [Figure S2] | S3      |
| 6. Crystal structure for <b>9ap</b> [Figure S3] | S3      |
| 7. Table-S1                                     | S4      |
| 8. Spectral data                                | S4-26   |
| 9. References                                   | S26     |

**General Methods:** The  $^1\text{H}$  NMR and  $^{13}\text{C}$  NMR spectra were recorded at 400 MHz and 100 MHz respectively. The chemical shifts are reported in ppm downfield to TMS ( $\delta = 0$ ) for  $^1\text{H}$  NMR and relative to the central  $\text{CDCl}_3$  resonance ( $\delta = 77.0$ ) for  $^{13}\text{C}$  NMR. *In the  $^{13}\text{C}$  NMR spectra, the nature of the carbons (C, CH,  $\text{CH}_2$  or  $\text{CH}_3$ ) was determined by recording the DEPT-135 experiment, and is given in parentheses.* The coupling constants  $J$  are given in Hz. Column chromatography was performed using Acme's silica gel (particle size 0.063-0.200 mm). High-resolution mass spectra were recorded on micromass ESI-TOF MS. GCMS mass spectrometry was performed on Shimadzu GCMS-QP2010 mass spectrometer. IR spectra were recorded on JASCO FT/IR-5300 and Thermo Nicolet FT/IR-5700. Elemental analyses were recorded on a Thermo Finnigan Flash EA 1112 analyzer. Mass spectra were recorded on either VG7070H mass spectrometer using EI technique or Shimadzu-LCMS-2010 A mass

spectrometer. The X-ray diffraction measurements were carried out at 298 K on an automated Enraf-Nonious MACH 3 diffractometer using graphite monochromated, Mo-K $\alpha$  ( $\lambda = 0.71073$  Å) radiation with CAD4 software or the X-ray intensity data were measured at 298 K on a Bruker SMART APEX CCD area detector system equipped with a graphite monochromator and a Mo-K $\alpha$  fine-focus sealed tube ( $\lambda = 0.71073$  Å). For thin-layer chromatography (TLC), silica gel plates Merck 60 F254 were used and compounds were visualized by irradiation with UV light and/or by treatment with a solution of p-anisaldehyde (23 mL), conc. H<sub>2</sub>SO<sub>4</sub> (35mL), acetic acid (10 mL), and ethanol (900 mL) followed by heating.

**Materials:** All solvents and commercially available chemicals were used as received. Starting materials **1a-g**,<sup>1</sup> and **8**<sup>2</sup> were synthesized based on the previous literature methods.

## General Experimental Procedures:

**Procedure A: General procedure for the DBU-catalyzed domino [3+2]-cycloaddition reactions in DMSO:** In an ordinary glass vial equipped with a magnetic stirring bar, to 0.10 mmol of DBU (**3e**) in DMSO (1.0 mL), was added 0.75 mmol of azides (**2** or **5**) and 0.5 mmol of corresponding enones (**1** or **8**) and the reaction mixture was stirred at 25 °C for 0.5-6.0 h. The crude reaction mixture was worked up with aqueous NH<sub>4</sub>Cl solution and the aqueous layer was extracted with dichloromethane (2 x 20 mL). The combined organic layers were dried (Na<sub>2</sub>SO<sub>4</sub>), filtered and concentrated. Pure click products were obtained by column chromatography (silica gel, mixture of hexane/ethyl acetate).

**Procedure B: General procedure for the DDQ oxidation of 4aa:** In a 10 mL round bottom flask equipped with a magnetic stirring bar, to 0.5 mmol of compound **4aa** was added 5.0 mL of dry toluene as a solvent and then DDQ (2 equiv., 1.0 mmol) was added. The reaction mixture were refluxed for 48 h, the crude product was purified by column chromatography on silica gel (hexane/EtOAc) to afford the oxidized product **11**.

**Procedure C: General procedure for the hydrogenation of 11:** In a 10 mL round bottomed flask, a solution of 0.5 mmol of **11** in dry methanol (5 mL) was taken followed by addition of Pd/C (10 mol%). The reaction mixture was purged with nitrogen gas followed by hydrogen gas. The reaction mixture was allowed to stir at 25 °C under the pressure of a hydrogen gas

filled balloon for 3 h. The crude reaction mixture was filtered through a pad of celite and the filtrate was concentrated under reduced pressure. The concentrate was subjected to column chromatography (silica gel, mixture of hexane/ethyl acetate) to obtain the pure compound **12** respectively.

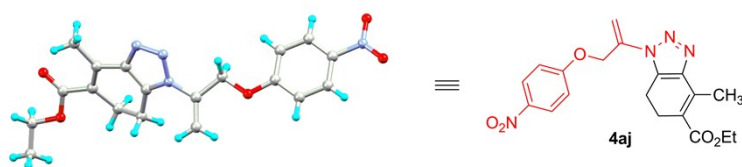

**Figure S1.** Crystal structure of ethyl 4-methyl-1-(3-(4-nitrophenoxy)prop-1-en-2-yl)-6,7-dihydro-1H-benzo[d][1,2,3]triazole-5-carboxylate (**4aj**).

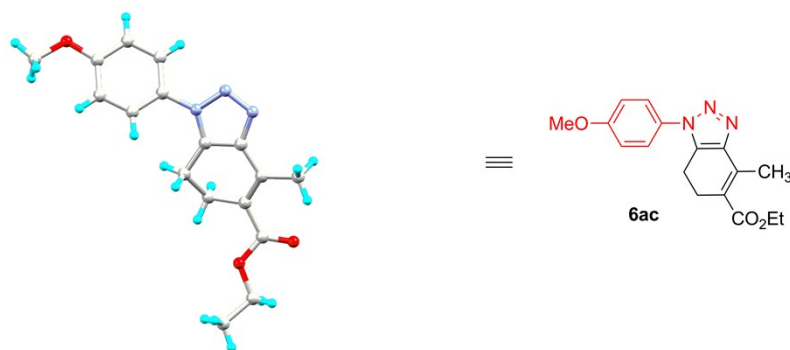

**Figure S2.** Crystal structure of ethyl 1-(4-methoxyphenyl)-4-methyl-6,7-dihydro-1H-benzo[d][1,2,3]triazole-5-carboxylate (**6ac**).

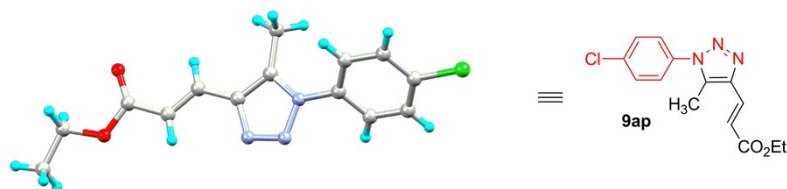

**Figure S3.** Crystal structure of (*E*)-ethyl 3-(1-(4-chlorophenyl)-5-methyl-1H-1,2,3-triazol-4-yl)acrylate (**9ap**).

**Table S1: Correlation of reactivity of different azides 2 with enone 1a under pyrrolidine-catalysis and DBU-catalysis**

| Entry | Azide | Pyrrolidine (10 mol%) |             | DBU (20 mol%) |                |
|-------|-------|-----------------------|-------------|---------------|----------------|
|       |       | Time (h)              | yield (%)   | Time (h)      | yield (%)      |
| 1     |       | 24 h                  | No Reaction | 0.5 h         | 90             |
| 2     |       | 66 h                  | 50          | 0.5 h         | 95             |
| 3     |       | 40 h                  | 50          | 0.75 h        | 88             |
| 4     |       | 24 h                  | 75          | 0.5 h         | 89             |
| 5     |       | 1.0 h                 | 93          | 0.5 h         | 89             |
| 6     |       | 1.0 h                 | 95          | 0.3 h         | 85             |
| 7     |       | 1.0 h                 | 95          | 0.5           | multiple spots |

Reference for pyrrolidine-catalysis, see: D. B. Ramachary and A. B. Shashank, *Chem. Eur. J.* **2013**, *19*, 13175-13181.

Reference for DBU-catalysis, see: present studies.

**Ethyl 4-methyl-1-(1-phenylvinyl)-6,7-dihydro-1H-benzo[d][1,2,3]triazole-5-carboxylate**

**(4aa)**: Prepared following the procedure **A** and purified by column chromatography using

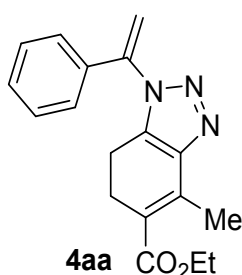

EtOAc/hexane (0.5:9.5 to 2:8) and was isolated as a white solid; Yield: 90% (139.5 mg); Mp.: 86-88 °C; IR (Neat):  $\nu_{\max}$  2979, 2923, 1689, 1603, 1477, 1371, 1274, 1200, 1108, 905, 812, 774, 702, 613 and 524  $\text{cm}^{-1}$ ; <sup>1</sup>H NMR (400 MHz, CDCl<sub>3</sub>)  $\delta$  7.41-7.35 (3H, m), 7.25-7.22 (2H, m), 5.78 (1H, d,  $J$  = 1.2 Hz, olefinic-*H*), 5.64 (1H, d,  $J$  = 0.8 Hz, olefinic-*H*), 4.24 (2H, q,  $J$  = 7.2 Hz, OCH<sub>2</sub>CH<sub>3</sub>), 2.72 (2H, qt,  $J$  = 8.8,

1.6 Hz), 2.62 (3H, t,  $J$  = 1.6 Hz, olefinic-CH<sub>3</sub>), 2.46 (2H, t,  $J$  = 9.2 Hz), 1.32 (3H, t,  $J$  = 7.2 Hz, OCH<sub>2</sub>CH<sub>3</sub>); <sup>13</sup>C NMR (CDCl<sub>3</sub>, DEPT-135)  $\delta$  167.7 (C, O-C=O), 145.4 (C), 141.8 (C), 138.2 (C), 134.5 (C), 134.2 (C), 129.7 (CH), 128.7 (2 x CH), 126.1 (2 x CH), 120.8 (C),

112.3 (CH<sub>2</sub>), 60.2 (CH<sub>2</sub>, OCH<sub>2</sub>CH<sub>3</sub>), 25.0 (CH<sub>2</sub>), 19.2 (CH<sub>2</sub>), 15.1 (CH<sub>3</sub>), 14.2 (CH<sub>3</sub>, OCH<sub>2</sub>CH<sub>3</sub>); HRMS (ESI-TOF) m/z 310.1556 (M + H<sup>+</sup>), calcd for C<sub>18</sub>H<sub>19</sub>N<sub>3</sub>O<sub>2</sub>H 310.1556.

**Ethyl 1-(1-(4-chlorophenyl)vinyl)-4-methyl-6,7-dihydro-1H-benzo[d][1,2,3]triazole-5-carboxylate (4ab):**

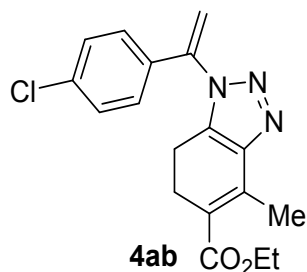

Prepared following the procedure **A** and purified by column chromatography using EtOAc/hexane (0.5:9.5 to 2:8) and was isolated as a light yellow solid; Yield: 84% (144.5 mg); Mp.: 92-94 °C; IR (Neat):  $\nu_{\max}$  2982, 2925, 1696, 1603, 1562, 1484, 1443, 1278, 1200, 1097, 1055, 839, 782 and 735 cm<sup>-1</sup>; <sup>1</sup>H NMR (400 MHz, CDCl<sub>3</sub>)  $\delta$  7.36 (2H, td,  $J$  = 8.4, 2.4 Hz), 7.18 (2H, td,  $J$  = 8.8, 2.0 Hz), 5.78 (1H, d,  $J$  = 0.8 Hz, olefinic-*H*), 5.64 (1H, br s, olefinic-*H*), 4.25 (2H, q,  $J$  = 7.2 Hz, OCH<sub>2</sub>CH<sub>3</sub>), 2.74 (2H, qt,  $J$  = 8.8, 1.6 Hz), 2.62 (3H, t,  $J$  = 1.6 Hz, olefinic-CH<sub>3</sub>), 2.49 (2H, t,  $J$  = 8.4 Hz), 1.33 (3H, t,  $J$  = 7.2 Hz, OCH<sub>2</sub>CH<sub>3</sub>); <sup>13</sup>C NMR (CDCl<sub>3</sub>, DEPT-135)  $\delta$  167.9 (C, O-C=O), 145.7 (C), 141.0 (C), 138.3 (C), 136.0 (C), 134.5 (C), 132.8 (C), 129.2 (2 x CH), 127.6 (2 x CH), 121.0 (C), 112.8 (CH<sub>2</sub>), 60.4 (CH<sub>2</sub>, OCH<sub>2</sub>CH<sub>3</sub>), 25.2 (CH<sub>2</sub>), 19.4 (CH<sub>2</sub>), 15.2 (CH<sub>3</sub>), 14.3 (CH<sub>3</sub>, OCH<sub>2</sub>CH<sub>3</sub>); HRMS (ESI-TOF) m/z 344.1166 (M + H<sup>+</sup>), calcd for C<sub>18</sub>H<sub>18</sub>ClN<sub>3</sub>O<sub>2</sub>H 344.1166.

**Ethyl 1-(1-(4-fluorophenyl)vinyl)-4-methyl-6,7-dihydro-1H-benzo[d][1,2,3]triazole-5-carboxylate (4ac):**

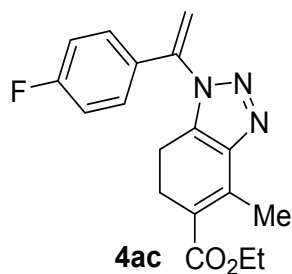

Prepared following the procedure **A** and purified by column chromatography using EtOAc/hexane (0.5:9.5 to 2:8) and was isolated as a light yellow solid; Yield: 85% (139.50 mg); Mp.: 103-105 °C; IR (Neat):  $\nu_{\max}$  2977, 2920, 2843, 1696, 1603, 1510, 1371, 1205, 1164, 1050, 839, 782, 725 and 673 cm<sup>-1</sup>; <sup>1</sup>H NMR (500 MHz, CDCl<sub>3</sub>)  $\delta$  7.24 (2H, tt,  $J$  = 8.5, 2.0 Hz), 7.08 (2H, tt,  $J$  = 8.5, 2.0 Hz), 5.74 (1H, d,  $J$  = 0.5 Hz, olefinic-*H*), 5.61 (1H, br s, olefinic-*H*), 4.26 (2H, q,  $J$  = 7.0 Hz, OCH<sub>2</sub>CH<sub>3</sub>), 2.74 (2H, qt,  $J$  = 8.5, 1.5 Hz), 2.62 (3H, t,  $J$  = 1.5 Hz, olefinic-CH<sub>3</sub>), 2.49 (2H, t,  $J$  = 8.5 Hz), 1.34 (3H, t,  $J$  = 7.0 Hz, OCH<sub>2</sub>CH<sub>3</sub>); <sup>13</sup>C NMR (CDCl<sub>3</sub>, DEPT-135)  $\delta$  167.9 (C, O-C=O), 163.5 (C, d,  $J$  = 248.7 Hz, C-F), 145.6 (C), 141.1 (C), 138.3 (C), 134.5 (C), 130.6 (C, d,  $J$  = 3.75 Hz), 128.3 (2 x CH, d,  $J$  = 8.75 Hz), 121.0 (C), 116.0 (2 x CH, d,  $J$  = 22.5 Hz), 112.2 (CH<sub>2</sub>), 60.4 (CH<sub>2</sub>, OCH<sub>2</sub>CH<sub>3</sub>), 25.2 (CH<sub>2</sub>), 19.3 (CH<sub>2</sub>), 15.2 (CH<sub>3</sub>), 14.3 (CH<sub>3</sub>, OCH<sub>2</sub>CH<sub>3</sub>); HRMS (ESI-TOF) m/z 328.1463 (M + H<sup>+</sup>), calcd for C<sub>18</sub>H<sub>18</sub>FN<sub>3</sub>O<sub>2</sub>H 328.1461.

**Ethyl 1-(1-(4-methoxyphenyl)vinyl)-4-methyl-6,7-dihydro-1H-benzo[d][1,2,3]triazole-5-**

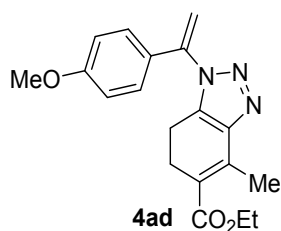

**4ad**

**carboxylate (4ad):** Prepared following the procedure **A** and purified by column chromatography using EtOAc/hexane (0.5:9.5 to 2:8) and was isolated as a colourless liquid; Yield: 81% (137.0 mg); IR (Neat):  $\nu_{\max}$  2982, 2930, 1701, 1603, 1479, 1438, 1371, 1283, 1205, 1050, 895, 864 and 756  $\text{cm}^{-1}$ ;  $^1\text{H}$  NMR (400 MHz,  $\text{CDCl}_3$ )  $\delta$  7.16 (2H, td,  $J$

= 8.8, 2.4 Hz), 6.89 (2H, td,  $J$  = 8.8, 2.4 Hz), 5.67 (1H, s, olefinic-*H*), 5.52 (1H, s, olefinic-*H*), 4.25 (2H, q,  $J$  = 7.2 Hz,  $\text{OCH}_2\text{CH}_3$ ), 3.83 (3H, s,  $\text{OCH}_3$ ), 2.71 (2H, br t,  $J$  = 8.4 Hz), 2.62 (3H, br s, olefinic- $\text{CH}_3$ ), 2.47 (2H, t,  $J$  = 8.8 Hz), 1.33 (3H, t,  $J$  = 7.2 Hz,  $\text{OCH}_2\text{CH}_3$ );  $^{13}\text{C}$  NMR ( $\text{CDCl}_3$ , DEPT-135)  $\delta$  168.0 (C,  $\text{O}-\text{C}=\text{O}$ ), 160.8 (C), 145.5 (C), 141.6 (C), 138.5 (C), 134.6 (C), 127.7 (2 x CH), 126.8 (C), 120.8 (C), 114.2 (2 x CH), 110.5 ( $\text{CH}_2$ ), 60.3 ( $\text{CH}_2$ ,  $\text{OCH}_2\text{CH}_3$ ), 55.3 ( $\text{CH}_3$ ,  $\text{OCH}_3$ ), 25.2 ( $\text{CH}_2$ ), 19.3 ( $\text{CH}_2$ ), 15.2 ( $\text{CH}_3$ ), 14.3 ( $\text{CH}_3$ ,  $\text{OCH}_2\text{CH}_3$ ); HRMS (ESI-TOF)  $m/z$  340.1660 ( $\text{M} + \text{H}^+$ ), calcd for  $\text{C}_{19}\text{H}_{21}\text{N}_3\text{O}_3\text{H}$  340.1661.

**Ethyl 4-methyl-1-(1-(*p*-tolyl)vinyl)-6,7-dihydro-1H-benzo[d][1,2,3]triazole-5-carboxylate**

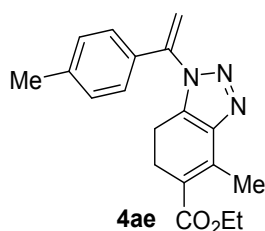

**4ae**

**(4ae):** Prepared following the procedure **A** and purified by column chromatography using EtOAc/hexane (0.5:9.5 to 2:8) and was isolated as a white solid; Yield: 83% (134.5 mg); Mp.: 100-102  $^\circ\text{C}$ ; IR (Neat):  $\nu_{\max}$  2982, 2920, 1686, 1629, 1603, 1567, 1515, 1365, 1283, 1200, 1159, 1055, 901, 828, 782 and 720  $\text{cm}^{-1}$ ;  $^1\text{H}$  NMR (500 MHz,  $\text{CDCl}_3$ )

$\delta$  7.18 (2H, br d,  $J$  = 8.5 Hz), 7.11 (2H, br d,  $J$  = 8.0 Hz), 5.73 (1H, s, olefinic-*H*), 5.59 (1H, s, olefinic-*H*), 4.24 (2H, q,  $J$  = 7.0 Hz,  $\text{OCH}_2\text{CH}_3$ ), 2.70 (2H, qt,  $J$  = 9.0, 1.5 Hz), 2.62 (3H, t,  $J$  = 1.5 Hz, olefinic- $\text{CH}_3$ ), 2.44 (2H, t,  $J$  = 9.0 Hz), 2.37 (3H, s, Ar- $\text{CH}_3$ ), 1.33 (3H, t,  $J$  = 7.0 Hz,  $\text{OCH}_2\text{CH}_3$ );  $^{13}\text{C}$  NMR ( $\text{CDCl}_3$ , DEPT-135)  $\delta$  168.0 (C,  $\text{O}-\text{C}=\text{O}$ ), 145.5 (C), 142.0 (C), 140.0 (C), 138.5 (C), 134.6 (C), 131.5 (C), 129.6 (2 x CH), 126.2 (2 x CH), 120.8 (C), 111.5 ( $\text{CH}_2$ ), 60.3 ( $\text{CH}_2$ ,  $\text{OCH}_2\text{CH}_3$ ), 25.2 ( $\text{CH}_2$ ), 21.2 ( $\text{CH}_3$ ), 19.4 ( $\text{CH}_2$ ), 15.2 ( $\text{CH}_3$ ), 14.3 ( $\text{CH}_3$ ,  $\text{OCH}_2\text{CH}_3$ ); HRMS (ESI-TOF)  $m/z$  324.1712 ( $\text{M} + \text{H}^+$ ), calcd for  $\text{C}_{19}\text{H}_{21}\text{N}_3\text{O}_2\text{H}$  324.1712.

**Ethyl 4-methyl-1-(1-(*m*-tolyl)vinyl)-6,7-dihydro-1H-benzo[d][1,2,3]triazole-5-**

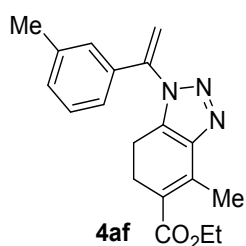

**4af**

**carboxylate (4af):** Prepared following the procedure **A** and purified by column chromatography using EtOAc/hexane (0.5:9.5 to 2:8) and was isolated as a colourless liquid; Yield: 82% (132.5 mg); IR (Neat):  $\nu_{\max}$  2981, 2359, 1734, 1699, 1371, 1239, 1199, 1045, 893, 734, 701 and 608  $\text{cm}^{-1}$ ;  $^1\text{H}$  NMR (500 MHz,  $\text{CDCl}_3$ )  $\delta$  7.26 (1H, t,  $J$  = 7.5 Hz), 7.22 (1H,

d,  $J$  = 7.5 Hz), 7.04 (1H, s), 7.02 (1H, d,  $J$  = 7.5 Hz), 5.76 (1H, s, olefinic-*H*), 5.63 (1H, s,

olefinic-*H*), 4.25 (2H, q,  $J = 7.0$  Hz,  $\text{OCH}_2\text{CH}_3$ ), 2.68 (2H, qt,  $J = 8.5, 1.5$  Hz), 2.63 (3H, t,  $J = 1.5$  Hz, olefinic- $\text{CH}_3$ ), 2.44 (2H, t,  $J = 8.5$  Hz), 2.35 (3H, s, Ar- $\text{CH}_3$ ), 1.33 (3H, t,  $J = 7.0$  Hz,  $\text{OCH}_2\text{CH}_3$ );  $^{13}\text{C}$  NMR ( $\text{CDCl}_3$ , DEPT-135)  $\delta$  167.9 (C, O- $\text{C}=\text{O}$ ), 145.4 (C), 142.0 (C), 138.6 (C), 138.4 (C), 134.6 (C), 134.2 (C), 130.6 (CH), 128.7 (CH), 126.8 (CH), 123.4 (CH), 120.8 (C), 112.2 ( $\text{CH}_2$ ), 60.3 ( $\text{CH}_2$ ,  $\text{OCH}_2\text{CH}_3$ ), 25.1 ( $\text{CH}_2$ ), 21.3 ( $\text{CH}_3$ ), 19.3 ( $\text{CH}_2$ ), 15.2 ( $\text{CH}_3$ ), 14.3 ( $\text{CH}_3$ ,  $\text{OCH}_2\text{CH}_3$ ); HRMS (ESI-TOF)  $m/z$  324.1712 ( $\text{M} + \text{H}^+$ ), calcd for  $\text{C}_{19}\text{H}_{21}\text{N}_3\text{O}_2\text{H}$  324.1712.

**Ethyl 4-methyl-1-(1-(*o*-tolyl)vinyl)-6,7-dihydro-1*H*-benzo[*d*][1,2,3]triazole-5-carboxylate**

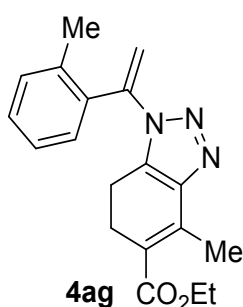

**(4ag):** Prepared following the procedure **A** and purified by column chromatography using EtOAc/hexane (0.5:9.5 to 2:8) and was isolated as a colourless liquid; Yield: 62% (100.5 mg); IR (Neat):  $\nu_{\text{max}}$  2983, 1735, 1372, 1233, 1043, 917, 846, 733, 633, 607 and 461  $\text{cm}^{-1}$ ;  $^1\text{H}$  NMR (500 MHz,  $\text{CDCl}_3$ )  $\delta$  7.34 (1H, t,  $J = 8.0$  Hz), 7.33 (1H, d,  $J = 8.0$  Hz),

7.26 (1H, dt,  $J = 8.0, 0.5$  Hz), 7.20 (1H, br d,  $J = 8.0$  Hz), 5.96 (1H, s, olefinic-*H*), 5.41 (1H, s, olefinic-*H*), 4.22 (2H, q,  $J = 7.0$  Hz,  $\text{OCH}_2\text{CH}_3$ ), 2.63 (2H, qt,  $J = 8.5, 2.0$  Hz), 2.59 (3H, t,  $J = 2.0$  Hz, olefinic- $\text{CH}_3$ ), 2.20 (2H, t,  $J = 8.5$  Hz), 1.97 (3H, s, Ar- $\text{CH}_3$ ), 1.31 (3H, t,  $J = 7.0$  Hz,  $\text{OCH}_2\text{CH}_3$ );  $^{13}\text{C}$  NMR ( $\text{CDCl}_3$ , DEPT-135)  $\delta$  167.7 (C, O- $\text{C}=\text{O}$ ), 145.7 (C), 142.1 (C), 138.3 (C), 136.3 (C), 134.0 (C), 133.6 (C), 130.7 (CH), 129.74 (CH), 129.71 (CH), 126.2 (CH), 120.6 (C), 112.3 ( $\text{CH}_2$ ), 60.2 ( $\text{CH}_2$ ,  $\text{OCH}_2\text{CH}_3$ ), 25.0 ( $\text{CH}_2$ ), 19.2 ( $\text{CH}_2$ ), 19.0 ( $\text{CH}_3$ ), 15.1 ( $\text{CH}_3$ ), 14.2 ( $\text{CH}_3$ ,  $\text{OCH}_2\text{CH}_3$ ); HRMS (ESI-TOF)  $m/z$  324.1714 ( $\text{M} + \text{H}^+$ ), calcd for  $\text{C}_{19}\text{H}_{21}\text{N}_3\text{O}_2\text{H}$  324.1712.

**Ethyl 4-methyl-1-(1-(naphthalen-2-yl)vinyl)-6,7-dihydro-1*H*-benzo[*d*][1,2,3]triazole-5-carboxylate (4ah):** Prepared following the procedure **A** and purified by column chromatography using EtOAc/hexane (0.5:9.5 to 2:8) and was isolated as a light yellow solid; Yield: 78% (140.5 mg); Mp.: 98-100  $^\circ\text{C}$ ; IR (Neat):  $\nu_{\text{max}}$  2977, 2925, 2837, 1701, 1608, 1515, 1463, 1371, 1298, 1257, 1200, 1055, 1030, 833 and 771  $\text{cm}^{-1}$ ;  $^1\text{H}$  NMR (500 MHz,  $\text{CDCl}_3$ )  $\delta$  7.83-7.81 (2H, m), 7.77 (1H, d,  $J = 7.0$  Hz), 7.61 (1H, s), 7.51-7.46 (2H, m), 7.36 (1H, d,  $J = 8.0$  Hz), 5.90 (1H, s, olefinic-*H*), 5.71 (1H, s, olefinic-*H*), 4.23 (2H, q,  $J = 7.0$  Hz,  $\text{OCH}_2\text{CH}_3$ ), 2.67 (2H, br t,  $J = 8.0$  Hz), 2.67 (3H, s, Ar- $\text{CH}_3$ ), 2.45 (2H, t,  $J = 8.0$  Hz), 1.31 (3H, t,  $J = 7.0$  Hz,  $\text{OCH}_2\text{CH}_3$ );

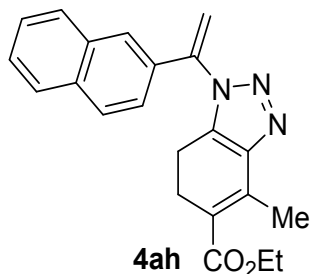

7.77 (1H, d,  $J = 7.0$  Hz), 7.61 (1H, s), 7.51-7.46 (2H, m), 7.36 (1H, d,  $J = 8.0$  Hz), 5.90 (1H, s, olefinic-*H*), 5.71 (1H, s, olefinic-*H*), 4.23 (2H, q,  $J = 7.0$  Hz,  $\text{OCH}_2\text{CH}_3$ ), 2.67 (2H, br t,  $J = 8.0$  Hz), 2.67 (3H, s, Ar- $\text{CH}_3$ ), 2.45 (2H, t,  $J = 8.0$  Hz), 1.31 (3H, t,  $J = 7.0$  Hz,  $\text{OCH}_2\text{CH}_3$ );



$^{13}\text{C}$  NMR ( $\text{CDCl}_3$ , DEPT-135)  $\delta$  167.6 (C, O-C=O), 145.3 (C), 141.7 (C), 138.1 (C), 134.5 (C), 133.4 (C), 132.7 (C), 131.3 (C), 128.6 (CH), 128.2 (CH), 127.5 (CH), 127.0 (CH), 126.7 (CH), 125.8 (CH), 123.1 (CH), 120.8 (C), 112.7 ( $\text{CH}_2$ ), 60.1 ( $\text{CH}_2$ ,  $\text{OCH}_2\text{CH}_3$ ), 25.0 ( $\text{CH}_2$ ), 19.1 ( $\text{CH}_2$ ), 15.1 ( $\text{CH}_3$ ), 14.1 ( $\text{CH}_3$ ,  $\text{OCH}_2\text{CH}_3$ ); HRMS (ESI-TOF)  $m/z$  360.1713 ( $\text{M} + \text{H}^+$ ), calcd for  $\text{C}_{22}\text{H}_{21}\text{N}_3\text{O}_2\text{H}$  360.1712.

**Ethyl (*E*)-4-methyl-1-styryl-6,7-dihydro-1*H*-benzo[d][1,2,3]triazole-5-carboxylate (4ai):**

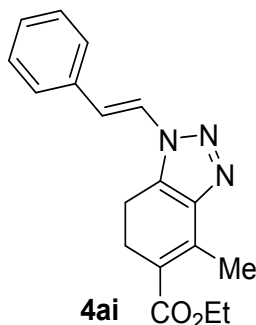

Prepared following the procedure **A** and purified by column chromatography using EtOAc/hexane (0.5:9.5 to 2:8) and was isolated as a white solid; Yield: 86% (133.5 mg); Mp.: 140-142 °C; IR (Neat):  $\nu_{\text{max}}$  3049, 2977, 2924, 1679, 1612, 1477, 1448, 1226, 1212, 1024, 751 and 693  $\text{cm}^{-1}$ ;  $^1\text{H}$  NMR (400 MHz,  $\text{CDCl}_3$ )  $\delta$  7.51 (1H, d,  $J = 13.6$  Hz, olefinic-*H*), 7.49 (2H, br d,  $J = 7.2$  Hz), 7.41 (2H, br t,  $J = 7.2$  Hz), 7.35 (1H, br t,  $J = 7.2$  Hz), 7.32 (1H, d,  $J = 11.6$  Hz, olefinic-*H*), 4.27 (2H, q,  $J = 7.2$  Hz,  $\text{OCH}_2\text{CH}_3$ ), 3.01 (2H, t,  $J = 7.6$  Hz), 2.89 (2H, qt,  $J = 8.0, 1.2$  Hz), 2.60 (3H, t,  $J = 1.2$  Hz, olefinic- $\text{CH}_3$ ), 1.36 (3H, t,  $J = 7.2$  Hz,  $\text{OCH}_2\text{CH}_3$ );  $^{13}\text{C}$  NMR ( $\text{CDCl}_3$ , DEPT-135)  $\delta$  167.8 (C, O-C=O), 145.8 (C), 138.3 (C), 133.7 (C), 132.7 (C), 128.9 (2 x CH), 128.8 (CH), 126.7 (2 x CH), 123.6 (CH), 120.9 (CH), 120.8 (C), 60.4 ( $\text{CH}_2$ ,  $\text{OCH}_2\text{CH}_3$ ), 25.1 ( $\text{CH}_2$ ), 18.9 ( $\text{CH}_2$ ), 15.2 ( $\text{CH}_3$ ), 14.3 ( $\text{CH}_3$ ,  $\text{OCH}_2\text{CH}_3$ ); HRMS (ESI-TOF)  $m/z$  310.1554 ( $\text{M} + \text{H}^+$ ), calcd for  $\text{C}_{18}\text{H}_{19}\text{N}_3\text{O}_2\text{H}$  310.1556.

**Ethyl 4-methyl-1-(3-(4-nitrophenoxy)prop-1-en-2-yl)-6,7-dihydro-1*H*-benzo[d][1,2,3]triazole-5-carboxylate (4aj):**

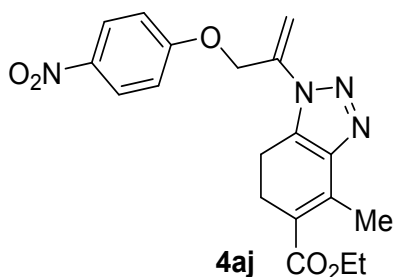

Prepared following the procedure **A** and purified by column chromatography using EtOAc/hexane (0.5:9.5 to 2:8) and was isolated as a yellow solid; Yield: 82% (158.0 mg); Mp.: 138-140 °C; IR (Neat):  $\nu_{\text{max}}$  2923, 1749, 1597, 1525, 1506, 1341, 1242, 1042, 854, 748, 689 and 500  $\text{cm}^{-1}$ ;  $^1\text{H}$  NMR (500 MHz,  $\text{CDCl}_3$ )  $\delta$  8.21 (2H, d,  $J = 8.5$  Hz), 7.07 (2H, d,  $J = 9.0$  Hz), 5.64 (1H, d,  $J = 0.5$  Hz, olefinic-*H*), 5.40 (1H, s, olefinic-*H*), 5.26 (2H, s), 4.27 (2H, q,  $J = 7.0$  Hz,  $\text{OCH}_2\text{CH}_3$ ), 2.96 (2H, t,  $J = 9.0$  Hz), 2.87 (2H, t,  $J = 8.5$  Hz), 2.59 (3H, s, olefinic- $\text{CH}_3$ ), 1.36 (3H, t,  $J = 7.0$  Hz,  $\text{OCH}_2\text{CH}_3$ );  $^{13}\text{C}$  NMR ( $\text{CDCl}_3$ , DEPT-135)  $\delta$  167.6 (C, O-C=O), 162.5 (C), 145.8 (C), 142.1 (C), 137.9 (C), 137.7 (C), 133.8 (C), 125.9 (2 x CH), 121.3 (C), 114.8 (2 x CH), 109.6



(CH<sub>2</sub>), 67.1 (CH<sub>2</sub>), 60.4 (CH<sub>2</sub>, OCH<sub>2</sub>CH<sub>3</sub>), 25.3 (CH<sub>2</sub>), 19.7 (CH<sub>2</sub>), 15.1 (CH<sub>3</sub>), 14.2 (CH<sub>3</sub>, OCH<sub>2</sub>CH<sub>3</sub>); HRMS (ESI-TOF) *m/z* 385.1512 (M + H<sup>+</sup>), calcd for C<sub>19</sub>H<sub>20</sub>N<sub>4</sub>O<sub>5</sub>H 385.1512.

**Ethyl 4-methyl-6-phenyl-1-(1-phenylvinyl)-6,7-dihydro-1H-benzo[d][1,2,3]triazole-5-carboxylate (4ba):** Prepared following the procedure **A** and purified by column

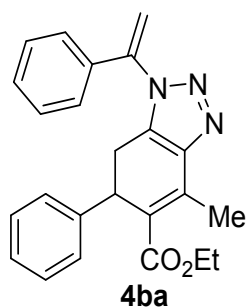

chromatography using EtOAc/hexane (0.5:9.5 to 2:8) and was isolated as a white solid; Yield: 80% (155.0 mg); Mp.: 80-82 °C; IR (Neat):  $\nu_{\max}$  2918, 2849, 1699, 1602, 1491, 1447, 1263, 1209, 1501, 964, 908, 774 and 698 cm<sup>-1</sup>; <sup>1</sup>H NMR (400 MHz, CDCl<sub>3</sub>)  $\delta$  7.28 (1H, br t, *J* = 8.0 Hz), 7.19–7.17 (3H, m), 7.13 (2H, br t, *J* = 8.0 Hz), 7.01–6.98 (2H, m), 6.94 (2H, td, *J* = 8.0, 0.8 Hz), 5.70 (1H, d, *J* = 0.8 Hz, olefinic-*H*), 5.55 (1H, d, *J* = 0.8 Hz, olefinic-*H*), 4.32 (1H, br d, *J* = 8.0 Hz), 4.11 (2H, q, *J* = 7.2 Hz, OCH<sub>2</sub>CH<sub>3</sub>), 3.03 (1H, dd, *J* = 16.8, 8.8 Hz), 2.77 (3H, d, *J* = 0.8 Hz, olefinic-CH<sub>3</sub>), 2.52 (1H, dd, *J* = 16.8, 2.0 Hz), 1.17 (3H, t, *J* = 7.2 Hz, OCH<sub>2</sub>CH<sub>3</sub>); <sup>13</sup>C NMR (CDCl<sub>3</sub>, DEPT-135)  $\delta$  167.4 (C, O-C=O), 145.6 (C), 142.0 (C), 141.7 (C), 139.2 (C), 133.7 (C), 132.8 (C), 129.5 (CH), 128.7 (2 x CH), 128.5 (2 x CH), 126.9 (2 x CH), 126.8 (CH), 126.0 (2 x CH), 124.1 (C), 112.5 (CH<sub>2</sub>), 60.4 (CH<sub>2</sub>, OCH<sub>2</sub>CH<sub>3</sub>), 41.0 (CH), 28.3 (CH<sub>2</sub>), 15.5 (CH<sub>3</sub>), 14.1 (CH<sub>3</sub>, OCH<sub>2</sub>CH<sub>3</sub>); HRMS (ESI-TOF) *m/z* 386.1869 (M + H<sup>+</sup>), calcd for C<sub>24</sub>H<sub>23</sub>N<sub>3</sub>O<sub>2</sub>H 386.1869.

**Ethyl 6-(4-chlorophenyl)-4-methyl-1-(1-phenylvinyl)-6,7-dihydro-1H-benzo[d][1,2,3]triazole-5-carboxylate (4ca):** Prepared following the procedure **A** and

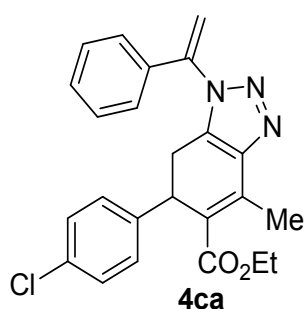

purified by column chromatography using EtOAc/hexane (0.5:9.5 to 2:8) and was isolated as a yellow solid; Yield: 70% (147.1 mg); Mp.: 96-98 °C; IR (Neat):  $\nu_{\max}$  2979, 2919, 1699, 1638, 1603, 1488, 1367, 1260, 1208, 1051, 1014, 907, 733 and 720 cm<sup>-1</sup>; <sup>1</sup>H NMR (500 MHz, CDCl<sub>3</sub>)  $\delta$  7.31 (1H, t, *J* = 7.5 Hz), 7.17–7.13 (4H, m), 6.93–6.91 (4H, m), 5.70 (1H, s, olefinic-*H*), 5.57 (1H, s, olefinic-*H*), 4.29 (1H, br d, *J* = 8.0 Hz), 4.12 (2H, q, *J* = 7.0 Hz, OCH<sub>2</sub>CH<sub>3</sub>), 3.02 (1H, dd, *J* = 17.0, 8.5 Hz), 2.78 (3H, br s, olefinic-CH<sub>3</sub>), 2.44 (1H, dd, *J* = 16.5, 2.0 Hz), 1.19 (3H, t, *J* = 7.0 Hz, OCH<sub>2</sub>CH<sub>3</sub>); <sup>13</sup>C NMR (CDCl<sub>3</sub>, DEPT-135)  $\delta$  167.2 (C, O-C=O), 145.5 (C), 141.7 (C), 140.5 (C), 139.7 (C), 133.8 (C), 132.6 (C), 132.5 (C), 129.7 (CH), 128.8 (2 x CH), 128.6 (2 x CH), 128.4 (2 x CH), 126.0 (2 x CH), 123.6 (C), 112.7 (CH<sub>2</sub>), 60.5 (CH<sub>2</sub>, OCH<sub>2</sub>CH<sub>3</sub>), 40.5 (CH),

28.2 (CH<sub>2</sub>), 15.5 (CH<sub>3</sub>), 14.1 (CH<sub>3</sub>, OCH<sub>2</sub>CH<sub>3</sub>); HRMS (ESI-TOF) *m/z* 420.1479 (M + H<sup>+</sup>), calcd for C<sub>24</sub>H<sub>22</sub>N<sub>3</sub>O<sub>2</sub>H 420.1479.

**Ethyl (S)-4,6-diphenyl-1-(1-phenylvinyl)-6,7-dihydro-1H-benzo[d][1,2,3]triazole-5-carboxylate (4da):** Prepared following the procedure **A** and purified by column

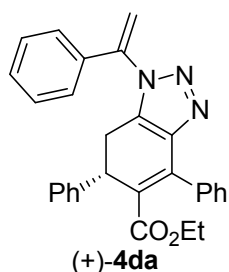

chromatography using EtOAc/hexane (0.5:9.5 to 2:8) and was isolated as a semi solid; Yield: 67% (149.5 mg); [ $\alpha$ ]<sub>D</sub><sup>25</sup> = +24.75 (*C* = 0.20, CHCl<sub>3</sub>, 89.9% *ee*); IR (Neat):  $\nu_{\max}$  2922, 2852, 1719, 1593, 1512, 1345, 1287, 1262, 1082, 1502, 854, 691 and 598 cm<sup>-1</sup>; <sup>1</sup>H NMR (400 MHz, CDCl<sub>3</sub>)  $\delta$  7.52 (2H, td, *J* = 6.8, 1.6 Hz), 7.45 (2H, tt, *J* = 6.8, 2.0 Hz), 7.41 (1H, tt, *J* = 6.8, 1.6 Hz), 7.29 (1H, tt, *J* = 7.6, 1.6 Hz), 7.24–7.23 (3H, m), 7.18–7.14 (4H, m), 6.98 (2H, td, *J* = 8.0, 1.2 Hz), 5.72 (1H, d, *J* = 1.2 Hz, olefinic-*H*), 5.57 (1H, d, *J* = 0.8 Hz, olefinic-*H*), 4.36 (1H, dd, *J* = 8.8, 2.8 Hz), 3.85–3.79 (2H, m, OCH<sub>2</sub>CH<sub>3</sub>), 3.17 (1H, dd, *J* = 16.8, 8.8 Hz), 2.63 (1H, dd, *J* = 16.8, 3.2 Hz), 0.77 (3H, t, *J* = 7.2 Hz, OCH<sub>2</sub>CH<sub>3</sub>); <sup>13</sup>C NMR (CDCl<sub>3</sub>, DEPT-135)  $\delta$  168.0 (C, O-C=O), 144.4 (C), 141.7 (C), 141.3 (C), 139.6 (C), 136.0 (C), 133.7 (C), 132.9 (C), 129.6 (CH), 128.8 (2 x CH), 128.7 (2 x CH), 128.6 (2 x CH), 128.3 (CH), 128.0 (2 x CH), 127.2 (CH), 127.1 (2 x CH), 126.4 (C), 126.0 (2 x CH), 112.8 (CH<sub>2</sub>), 60.5 (CH<sub>2</sub>, OCH<sub>2</sub>CH<sub>3</sub>), 42.0 (CH), 28.4 (CH<sub>2</sub>), 13.3 (CH<sub>3</sub>, OCH<sub>2</sub>CH<sub>3</sub>); HRMS (ESI-TOF) *m/z* 448.2024 (M + H<sup>+</sup>), calcd for C<sub>29</sub>H<sub>25</sub>N<sub>3</sub>O<sub>2</sub>H 448.2025.

**Ethyl 4-methyl-6-(4-nitrophenyl)-1-(1-phenylvinyl)-1H-benzo[d][1,2,3]triazole-5-carboxylate (4ea):** Prepared following the procedure **A** and purified by column

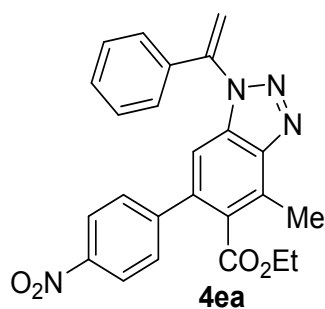

chromatography using EtOAc/hexane (0.5:9.5 to 2:8) and was isolated as a yellow solid; Yield: 36% (78.0 mg); Mp.: 128–130 °C; IR (Neat):  $\nu_{\max}$  3054, 2919, 2856, 1719, 1595, 1513, 1341, 1267, 1046, 778 and 708 cm<sup>-1</sup>; <sup>1</sup>H NMR (400 MHz, CDCl<sub>3</sub>)  $\delta$  8.22 (2H, td, *J* = 8.8, 2.0 Hz), 7.46–7.42 (3H, m), 7.39 (2H, tt, *J* = 6.8, 2.8 Hz), 7.28 (2H, td, *J* = 6.8, 1.2 Hz), 6.83 (1H, s, Ar-*H*), 5.86 (1H, d, *J* = 1.2 Hz, olefinic-*H*), 5.81 (1H, d, *J* = 1.2 Hz, olefinic-*H*), 4.10 (2H, q, *J* = 7.2 Hz, OCH<sub>2</sub>CH<sub>3</sub>), 2.95 (3H, s, Ar-CH<sub>3</sub>), 1.03 (3H, t, *J* = 7.2 Hz, OCH<sub>2</sub>CH<sub>3</sub>); <sup>13</sup>C NMR (CDCl<sub>3</sub>, DEPT-135)  $\delta$  168.1 (C, O-C=O), 147.3 (C), 147.2 (C), 145.5 (C), 142.3 (C), 138.3 (C), 134.1 (C), 132.6 (C), 130.8 (C), 130.0 (CH), 129.3 (2 x CH), 129.2 (C), 128.9 (2 x CH), 126.7 (2 x

CH), 123.5 (2 x CH), 111.8 (CH<sub>2</sub>), 109.6 (CH), 61.5 (CH<sub>2</sub>, OCH<sub>2</sub>CH<sub>3</sub>), 14.4 (CH<sub>3</sub>), 13.7 (CH<sub>3</sub>); HRMS (ESI-TOF) *m/z* 429.1563 (M + H<sup>+</sup>), calcd for C<sub>24</sub>H<sub>20</sub>N<sub>4</sub>O<sub>4</sub>H 429.1563.

**Ethyl 6-ethyl-4-methyl-1-(1-phenylvinyl)-6,7-dihydro-1*H*-benzo[d][1,2,3]triazole-5-carboxylate (4fa):** Prepared following the procedure **A** and purified by column

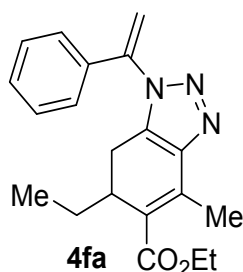

chromatography using EtOAc/hexane (0.5:9.5 to 2:8) and was isolated as a yellowish semi solid; Yield: 78% (132.0 mg); IR (Neat):  $\nu_{\max}$  2961, 2926, 1695, 1601, 1296, 1207, 1051, 907, 773 and 695 cm<sup>-1</sup>; <sup>1</sup>H NMR (400 MHz, CDCl<sub>3</sub>)  $\delta$  7.42-7.36 (3H, m), 7.23 (2H, dd, *J* = 8.0, 2.0 Hz), 5.79 (1H, d, *J* = 0.4 Hz, olefinic-*H*), 5.65 (1H, s, olefinic-*H*), 4.29-4.21 (2H, m, OCH<sub>2</sub>CH<sub>3</sub>), 2.97-2.91 (1H, m), 2.61 (3H, s, Ar-CH<sub>3</sub>), 2.60 (1H,

dd, *J* = 16.8, 7.6 Hz), 2.41 (1H, dd, *J* = 17.2, 1.2 Hz), 1.47-1.38 (1H, m), 1.33 (3H, t, *J* = 7.2 Hz, OCH<sub>2</sub>CH<sub>3</sub>), 1.22-1.15 (1H, m), 0.67 (3H, t, *J* = 7.2 Hz, CH<sub>2</sub>CH<sub>3</sub>); <sup>13</sup>C NMR (CDCl<sub>3</sub>, DEPT-135)  $\delta$  168.0 (C, O-C=O), 145.0 (C), 142.0 (C), 137.2 (C), 134.4 (C), 133.8 (C), 129.8 (CH), 128.9 (2 x CH), 126.3 (2 x CH), 126.2 (C), 112.6 (CH<sub>2</sub>), 60.3 (CH<sub>2</sub>, OCH<sub>2</sub>CH<sub>3</sub>), 36.9 (CH), 25.8 (CH<sub>2</sub>), 22.9 (CH<sub>2</sub>), 15.5 (CH<sub>3</sub>, Ar-CH<sub>3</sub>), 14.3 (CH<sub>3</sub>, OCH<sub>2</sub>CH<sub>3</sub>), 11.2 (CH<sub>3</sub>, CH<sub>2</sub>CH<sub>3</sub>); HRMS (ESI-TOF) *m/z* 338.1868 (M + H<sup>+</sup>), calcd for C<sub>20</sub>H<sub>23</sub>N<sub>3</sub>O<sub>2</sub>H 338.1868.

**Ethyl 4-methyl-6-phenethyl-1-(1-phenylvinyl)-6,7-dihydro-1*H*-benzo[d][1,2,3]triazole-5-carboxylate (4ga):** Prepared following the procedure **A** and purified by column

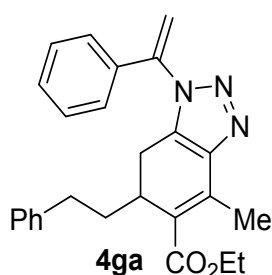

chromatography using EtOAc/hexane (0.5:9.5 to 2:8) and was isolated as a colourless liquid; Yield: 77% (160.1 mg); IR (Neat):  $\nu_{\max}$  2924, 2853, 1699, 1602, 1451, 1367, 1258, 1207, 1051, 909, 749 and 698 cm<sup>-1</sup>; <sup>1</sup>H NMR (500 MHz, CDCl<sub>3</sub>)  $\delta$  7.42-7.33 (3H, m), 7.24-7.20 (5H, m), 7.00 (2H, d, *J* = 6.0 Hz), 5.78 (1H, s, olefinic-*H*), 5.64 (1H, s, olefinic-*H*), 4.23-4.19 (2H, m, OCH<sub>2</sub>CH<sub>3</sub>), 3.10-3.05 (1H, m), 2.64-

2.58 (1H, m), 2.63 (3H, s, Ar-CH<sub>3</sub>), 2.47-2.40 (2H, m), 2.33-2.27 (1H, m), 1.76-1.69 (1H, m), 1.55-1.47 (1H, m), 1.28 (3H, t, *J* = 7.0 Hz, OCH<sub>2</sub>CH<sub>3</sub>); <sup>13</sup>C NMR (CDCl<sub>3</sub>, DEPT-135)  $\delta$  167.7 (C, O-C=O), 144.9 (C), 141.9 (C), 141.3 (C), 137.8 (C), 134.4 (C), 133.6 (C), 129.8 (CH), 128.9 (2 x CH), 128.2 (2 x CH), 128.1 (2 x CH), 126.3 (2 x CH), 125.9 (C), 125.8 (CH), 112.7 (CH<sub>2</sub>), 60.3 (CH<sub>2</sub>, OCH<sub>2</sub>CH<sub>3</sub>), 35.0 (CH), 34.1 (CH<sub>2</sub>), 32.8 (CH<sub>2</sub>), 23.2 (CH<sub>2</sub>), 15.5 (CH<sub>3</sub>), 14.2 (CH<sub>3</sub>); HRMS (ESI-TOF) *m/z* 414.2182 (M + H<sup>+</sup>), calcd for C<sub>26</sub>H<sub>27</sub>N<sub>3</sub>O<sub>2</sub>H 414.2181.

**Ethyl 4-methyl-1-phenyl-6,7-dihydro-1H-benzo[d][1,2,3]triazole-5-carboxylate (6aa):**

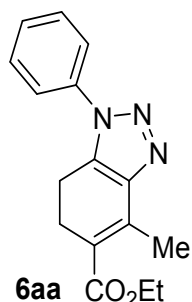

Prepared following the procedure **A** and purified by column chromatography using EtOAc/hexane (0.5:9.5 to 2:8) and was isolated as a white solid; Yield: 95% (135 mg); Mp.: 96-98 °C; IR (Neat):  $\nu_{\max}$  3066, 2988, 2930, 1699, 1605, 1508, 1449, 1285, 1201, 1054, 918, 761, 693 and 670  $\text{cm}^{-1}$ ; <sup>1</sup>H NMR (400 MHz, CDCl<sub>3</sub>)  $\delta$  7.55 (4H, br s), 7.50 (1H, br s), 4.28 (2H, q,  $J = 7.2$  Hz, OCH<sub>2</sub>CH<sub>3</sub>), 2.97 (2H, br t,  $J = 8.0$  Hz), 2.85 (2H, br t,  $J = 8.0$  Hz), 2.64 (3H, br s, olefinic-CH<sub>3</sub>), 1.36 (3H, t,  $J = 6.8$  Hz, OCH<sub>2</sub>CH<sub>3</sub>); <sup>13</sup>C NMR (CDCl<sub>3</sub>, DEPT-135)  $\delta$  167.9 (C, O-C=O), 146.0 (C), 138.7 (C), 136.1 (C), 133.5 (C), 129.6 (2 x CH), 129.1 (CH), 123.0 (2 x CH), 120.9 (C), 60.4 (CH<sub>2</sub>, OCH<sub>2</sub>CH<sub>3</sub>), 25.4 (CH<sub>2</sub>), 19.6 (CH<sub>2</sub>), 15.3 (CH<sub>3</sub>, olefinic-CH<sub>3</sub>), 14.3 (CH<sub>3</sub>, OCH<sub>2</sub>CH<sub>3</sub>); HRMS (ESI-TOF)  $m/z$  284.1402 (M + H<sup>+</sup>), calcd for C<sub>16</sub>H<sub>17</sub>N<sub>3</sub>O<sub>2</sub>H 284.1399.

**Ethyl 4-methyl-1-(*p*-tolyl)-6,7-dihydro-1H-benzo[d][1,2,3]triazole-5-carboxylate (6ab):**

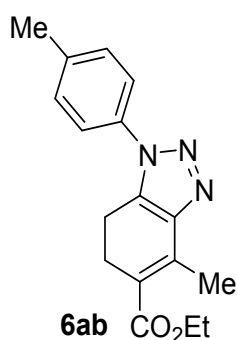

Prepared following the procedure **A** and purified by column chromatography using EtOAc/hexane (0.5:9.5 to 2:8) and was isolated as a white solid; Yield: 88% (130.5 mg); Mp.: 100-102 °C; IR (Neat):  $\nu_{\max}$  3039, 2982, 2928, 1693, 1520, 1441, 1284, 1202, 1116, 1046, 821 and 776  $\text{cm}^{-1}$ ; <sup>1</sup>H NMR (500 MHz, CDCl<sub>3</sub>)  $\delta$  7.42 (2H, d,  $J = 8.5$  Hz), 7.34 (2H, d,  $J = 8.5$  Hz), 4.27 (2H, q,  $J = 7.0$  Hz, OCH<sub>2</sub>CH<sub>3</sub>), 2.94 (2H, t,  $J = 8.0$  Hz), 2.84 (2H, t,  $J = 8.0$  Hz), 2.64 (3H, s, olefinic-CH<sub>3</sub>), 2.44 (3H, s, Ar-CH<sub>3</sub>), 1.36 (3H, t,  $J = 7.0$  Hz, OCH<sub>2</sub>CH<sub>3</sub>); <sup>13</sup>C NMR (CDCl<sub>3</sub>, DEPT-135)  $\delta$  167.9 (C, O-C=O), 145.9 (C), 139.3 (C), 138.8 (C), 133.7 (C), 133.5 (C), 130.1 (2 x CH), 122.9 (2 x CH), 120.8 (C), 60.4 (CH<sub>2</sub>, OCH<sub>2</sub>CH<sub>3</sub>), 25.4 (CH<sub>2</sub>), 21.1 (CH<sub>3</sub>, Ar-CH<sub>3</sub>), 19.6 (CH<sub>2</sub>), 15.3 (CH<sub>3</sub>, olefinic-CH<sub>3</sub>), 14.3 (CH<sub>3</sub>, OCH<sub>2</sub>CH<sub>3</sub>); HRMS (ESI-TOF)  $m/z$  298.1559 (M + H<sup>+</sup>), calcd for C<sub>17</sub>H<sub>19</sub>N<sub>3</sub>O<sub>2</sub>H 298.1556.

**Ethyl 1-(4-methoxyphenyl)-4-methyl-6,7-dihydro-1H-benzo[d][1,2,3]triazole-5-carboxylate (6ac):**

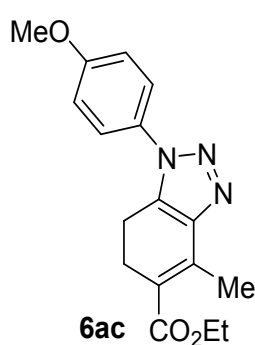

Prepared following the procedure **A** and purified by column chromatography using EtOAc/hexane (0.5:9.5 to 2:8) and was isolated as a white solid; Yield: 86% (134.5 mg); Mp.: 120-122 °C; IR (Neat):  $\nu_{\max}$  2992, 2951, 1768, 1696, 1605, 1518, 1285, 1248, 1205, 1114, 1035, 835 and 782  $\text{cm}^{-1}$ ; <sup>1</sup>H NMR (400 MHz, CDCl<sub>3</sub>)  $\delta$  7.44 (2H, td,  $J = 8.8, 3.6$  Hz), 7.04 (2H, td,  $J = 8.8, 3.6$  Hz), 4.27 (2H, q,  $J = 7.2$  Hz, OCH<sub>2</sub>CH<sub>3</sub>), 3.87 (3H, s, OCH<sub>3</sub>), 2.94-2.90 (2H, m), 2.86-2.82 (2H,

m), 2.63 (3H, s, olefinic-CH<sub>3</sub>), 1.35 (3H, t, *J* = 7.2 Hz, OCH<sub>2</sub>CH<sub>3</sub>); <sup>13</sup>C NMR (CDCl<sub>3</sub>, DEPT-135) δ 167.9 (C, O-C=O), 160.0 (C), 145.7 (C), 138.7 (C), 133.5 (C), 129.1 (C), 124.4 (2 x CH), 120.7 (C), 114.6 (2 x CH), 60.3 (CH<sub>2</sub>, OCH<sub>2</sub>CH<sub>3</sub>), 55.5 (CH<sub>3</sub>, OCH<sub>3</sub>), 25.3 (CH<sub>2</sub>), 19.4 (CH<sub>2</sub>), 15.2 (CH<sub>3</sub>, olefinic-CH<sub>3</sub>), 14.3 (CH<sub>3</sub>, OCH<sub>2</sub>CH<sub>3</sub>); HRMS (ESI-TOF) *m/z* 314.1505 (M + H<sup>+</sup>), calcd for C<sub>17</sub>H<sub>19</sub>N<sub>3</sub>O<sub>3</sub>H 314.1505.

**Ethyl 1-(4-fluorophenyl)-4-methyl-6,7-dihydro-1*H*-benzo[d][1,2,3]triazole-5-carboxylate (6ad):** Prepared following the procedure A and purified by column chromatography using

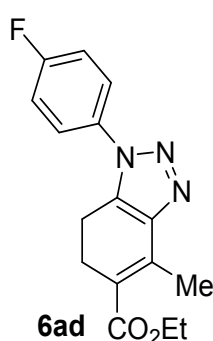

EtOAc/hexane (0.5:9.5 to 2:8) and was isolated as a colourless liquid; Yield: 88% (150.5 mg); IR (Neat):  $\nu_{\max}$  3078, 2988, 2853, 1700, 1606, 1517, 1445, 1203, 1051, 842, 774, 703 and 603 cm<sup>-1</sup>; <sup>1</sup>H NMR (500 MHz, CDCl<sub>3</sub>) δ 7.55-7.53 (2H, m), 7.27-7.23 (2H, m), 4.27 (2H, q, *J* = 7.0 Hz, OCH<sub>2</sub>CH<sub>3</sub>), 2.95 (2H, t, *J* = 8.0 Hz), 2.86 (2H, t, *J* = 8.0 Hz), 2.62 (3H, s, olefinic-CH<sub>3</sub>), 1.36 (3H, t, *J* = 7.0 Hz, OCH<sub>2</sub>CH<sub>3</sub>); <sup>13</sup>C NMR (CDCl<sub>3</sub>, DEPT-135) δ 167.7 (C, O-C=O), 162.6 (C, d, *J* = 248.7 Hz, C-F), 145.9

(C), 138.4 (C), 133.5 (C), 132.2 (C, d, *J* = 2.5 Hz), 124.9 (2 x CH, d, *J* = 8.75 Hz), 121.0 (C), 116.6 (2 x CH, d, *J* = 23.7 Hz), 60.3 (CH<sub>2</sub>, OCH<sub>2</sub>CH<sub>3</sub>), 25.3 (CH<sub>2</sub>), 19.4 (CH<sub>2</sub>), 15.2 (CH<sub>3</sub>, olefinic-CH<sub>3</sub>), 14.2 (CH<sub>3</sub>, OCH<sub>2</sub>CH<sub>3</sub>); HRMS (ESI-TOF) *m/z* 302.1306 (M + H<sup>+</sup>), calcd for C<sub>16</sub>H<sub>16</sub>FN<sub>3</sub>O<sub>2</sub>H 302.1305.

**Ethyl 1-(4-bromophenyl)-4-methyl-6,7-dihydro-1*H*-benzo[d][1,2,3]triazole-5-carboxylate (6ae):** Prepared following the procedure A and purified by column

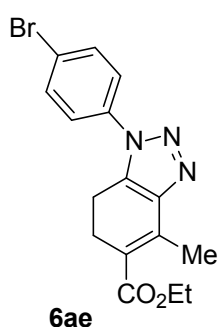

chromatography using (0.5:9.5 to 2:8) and was isolated as a white solid; Yield: 89% (160.4 mg); Mp.: 140-142 °C; IR (neat):  $\nu_{\max}$  3400, 1698, 1608, 1494, 1458, 1283, 1202, 1107, 1040, 823 and 725 cm<sup>-1</sup>; <sup>1</sup>H NMR (400 MHz, CDCl<sub>3</sub>) δ 7.68 (2H, td, *J* = 7.2, 1.6 Hz), 7.44 (2H, td, *J* = 7.2, 1.6 Hz), 4.27 (2H, q, *J* = 6.0 Hz, OCH<sub>2</sub>CH<sub>3</sub>), 2.96 (2H, dt, *J* = 6.8, 1.2 Hz), 2.86 (2H, qt, *J* = 7.2, 1.2 Hz), 2.62 (3H, t, *J* = 1.2 Hz, olefinic-CH<sub>3</sub>),

1.36 (3H, t, *J* = 5.6 Hz, OCH<sub>2</sub>CH<sub>3</sub>); <sup>13</sup>C NMR (CDCl<sub>3</sub>, DEPT-135) δ 167.7 (C, O-C=O), 146.2 (C), 138.4 (C), 135.1 (C), 133.3 (C), 132.8 (2 x CH), 124.3 (2 x CH), 122.9 (C), 121.1 (C), 60.4 (CH<sub>2</sub>), 25.3 (CH<sub>2</sub>), 19.6 (CH<sub>2</sub>), 15.2 (CH<sub>3</sub>, olefinic-CH<sub>3</sub>), 14.3 (CH<sub>3</sub>, OCH<sub>2</sub>CH<sub>3</sub>); HRMS (ESI-TOF) *m/z* 362.0504 (M + H<sup>+</sup>), calcd for C<sub>16</sub>H<sub>16</sub>BrN<sub>3</sub>O<sub>2</sub>H 362.0504.

**Ethyl 1-(3-bromophenyl)-4-methyl-6,7-dihydro-1H-benzo[d][1,2,3]triazole-5-carboxylate (6af):** Prepared following the procedure A and purified by column chromatography using EtOAc/hexane (0.5:9.5 to 2:8) and was isolated as a white solid; Yield: 80% (144.4 mg); Mp.: 102-104 °C; IR (Neat):  $\nu_{\max}$  2980, 1699, 1605, 1495, 1441, 1274, 1201, 1095, 1035, 995, 869, 783, 762 and 433  $\text{cm}^{-1}$ ;  $^1\text{H}$  NMR (500 MHz,  $\text{CDCl}_3$ )  $\delta$  7.75 (1H, t,  $J = 2.0$  Hz), 7.63 (1H, ddd,  $J = 8.0, 2.0, 1.0$  Hz), 7.49 (1H, ddd,  $J = 8.0, 2.0, 1.0$  Hz), 7.43 (1H, t,  $J = 8.0$  Hz), 4.28 (2H, q,  $J = 7.5$  Hz,  $\text{OCH}_2\text{CH}_3$ ), 2.98 (2H, br t,  $J = 8.5$  Hz), 2.87 (2H, qt,  $J = 8.0, 1.5$  Hz), 2.63 (3H, t,  $J = 1.5$  Hz, olefinic- $\text{CH}_3$ ), 1.36 (3H, t,  $J = 7.0$  Hz,  $\text{OCH}_2\text{CH}_3$ );  $^{13}\text{C}$  NMR ( $\text{CDCl}_3$ , DEPT-135)  $\delta$  167.8 (C,  $\text{O}-\text{C}=\text{O}$ ), 146.2 (C), 138.4 (C), 137.2 (C), 133.4 (C), 132.1 (CH), 130.9 (CH), 126.1 (CH), 123.2 (C), 121.5 (CH), 121.2 (C), 60.4 ( $\text{CH}_2$ ,  $\text{OCH}_2\text{CH}_3$ ), 25.4 ( $\text{CH}_2$ ), 19.7 ( $\text{CH}_2$ ), 15.2 ( $\text{CH}_3$ , olefinic- $\text{CH}_3$ ), 14.3 ( $\text{CH}_3$ ,  $\text{OCH}_2\text{CH}_3$ ); HRMS (ESI-TOF)  $m/z$  362.0504 ( $\text{M} + \text{H}^+$ ), calcd for  $\text{C}_{16}\text{H}_{16}\text{BrN}_3\text{O}_2\text{H}$  362.0504.

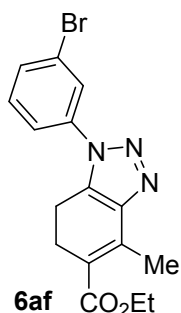

**Ethyl 1-(2-bromophenyl)-4-methyl-6,7-dihydro-1H-benzo[d][1,2,3]triazole-5-carboxylate (6ag):** Prepared following the procedure A and purified by column chromatography using EtOAc/hexane (0.5:9.5 to 2:8) and was isolated as a colourless liquid; Yield: 64% (115.4 mg); Mp.: 252-254 °C; IR (Neat):  $\nu_{\max}$  2979, 2925, 2853, 1700, 1608, 1507, 1442, 1369, 1285, 1202, 1052, 764 and 668  $\text{cm}^{-1}$ ;  $^1\text{H}$  NMR (400 MHz,  $\text{CDCl}_3$ )  $\delta$  7.78-7.76 (1H, m), 7.52-7.45 (3H, m), 4.27 (2H, q,  $J = 6.8$  Hz,  $\text{OCH}_2\text{CH}_3$ ), 2.85 (2H, t,  $J = 7.6$  Hz), 2.76 (2H, t,  $J = 7.6$  Hz), 2.65 (3H, s, olefinic- $\text{CH}_3$ ), 1.35 (3H, t,  $J = 7.2$  Hz,  $\text{OCH}_2\text{CH}_3$ );  $^{13}\text{C}$  NMR ( $\text{CDCl}_3$ , DEPT-135)  $\delta$  168.0 (C,  $\text{O}-\text{C}=\text{O}$ ), 145.1 (C), 138.5 (C), 136.0 (C), 135.2 (C), 133.7 (CH), 131.8 (CH), 128.9 (CH), 128.5 (CH), 121.0 (C), 120.5 (C), 60.4 ( $\text{CH}_2$ ,  $\text{OCH}_2\text{CH}_3$ ), 25.2 ( $\text{CH}_2$ ), 19.0 ( $\text{CH}_2$ ), 15.3 ( $\text{CH}_3$ , olefinic- $\text{CH}_3$ ), 14.3 ( $\text{CH}_3$ ,  $\text{OCH}_2\text{CH}_3$ ); HRMS (ESI-TOF)  $m/z$  362.0504 ( $\text{M} + \text{H}^+$ ), calcd for  $\text{C}_{16}\text{H}_{16}\text{BrN}_3\text{O}_2\text{H}$  362.0504.

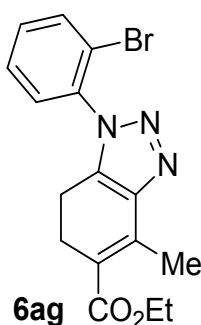

**Ethyl 4-methyl-1-(4-(trifluoromethyl)phenyl)-6,7-dihydro-1H-benzo[d][1,2,3]triazole-5-carboxylate (6ah):** Prepared following the procedure A and purified by column chromatography using EtOAc/hexane (0.5:9.5 to 2:8) and was isolated as a white solid; Yield: 89% (156.5 mg); Mp.: 143-145 °C; IR (Neat):  $\nu_{\max}$  2989, 2894, 1688, 1614, 1525, 1442, 1417, 1373, 1324, 1261, 1205, 1166, 1118, 843, 777, 738 and 596  $\text{cm}^{-1}$ ;  $^1\text{H}$  NMR (400 MHz,  $\text{CDCl}_3$ )  $\delta$  7.83 (2H, d,  $J = 7.6$  Hz), 7.72 (2H, d,  $J = 7.6$  Hz), 4.28

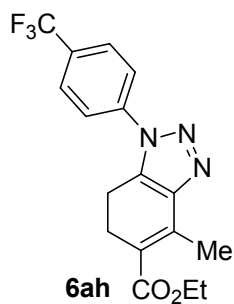

(2H, q,  $J = 6.8$  Hz,  $\text{OCH}_2\text{CH}_3$ ), 3.02 (2H, t,  $J = 8.0$  Hz), 2.88 (2H, t,  $J = 8.0$  Hz), 2.63 (3H, s, olefinic- $\text{CH}_3$ ), 1.36 (3H, t,  $J = 7.2$  Hz,  $\text{OCH}_2\text{CH}_3$ );  $^{13}\text{C}$  NMR ( $\text{CDCl}_3$ , DEPT-135)  $\delta$  167.7 (C,  $\text{O}-\text{C}=\text{O}$ ), 146.5 (C), 138.9 (C), 138.3 (C), 133.5 (C), 131.1 (C, q,  $J = 26$  Hz), 127.0 (2 x CH, q,  $J = 3.0$  Hz), 123.5 (C, q,  $J = 217.0$  Hz,  $\text{CF}_3$ ), 123.0 (2 x CH), 121.4 (C), 60.5 ( $\text{CH}_2$ ,  $\text{OCH}_2\text{CH}_3$ ), 25.4 ( $\text{CH}_2$ ), 19.8 ( $\text{CH}_2$ ), 15.3 ( $\text{CH}_3$ , olefinic- $\text{CH}_3$ ), 14.3 ( $\text{CH}_3$ ,  $\text{OCH}_2\text{CH}_3$ ); HRMS (ESI-TOF)  $m/z$  352.1274 ( $\text{M} + \text{H}^+$ ), calcd for  $\text{C}_{17}\text{H}_{16}\text{F}_3\text{N}_3\text{O}_2\text{H}$  352.1273.

**Ethyl 4-methyl-1-(4-nitrophenyl)-6,7-dihydro-1H-benzo[d][1,2,3]triazole-5-carboxylate**

**(6ai):** Prepared following the procedure A and purified by column chromatography using

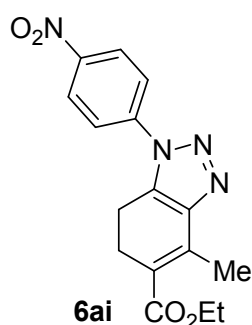

EtOAc/hexane (0.5:9.5 to 2:8) and was isolated as a white solid; Yield: 85% (140.0 mg); Mp.: 138-140 °C; IR (neat):  $\nu_{\text{max}}$  3096, 2976, 2926, 1699, 1598, 1527, 1444, 1347, 1297, 1203, 1114, 1054, 856, 749 and 686  $\text{cm}^{-1}$ ;  $^1\text{H}$  NMR (500 MHz,  $\text{CDCl}_3$ )  $\delta$  8.45 (2H, td,  $J = 9.5$ , 1.5 Hz), 7.82 (2H, td,  $J = 9.0$ , 2.0 Hz), 4.29 (2H, q,  $J = 7.0$  Hz,  $\text{OCH}_2\text{CH}_3$ ), 3.07 (2H, t,  $J = 8.5$  Hz), 2.91 (2H, t,  $J = 9.0$  Hz), 2.63 (3H, s, olefinic- $\text{CH}_3$ ), 1.37 (3H, t,  $J = 7.0$  Hz,  $\text{OCH}_2\text{CH}_3$ );  $^{13}\text{C}$  NMR ( $\text{CDCl}_3$ , DEPT-135)  $\delta$  167.6 (C,  $\text{O}-\text{C}=\text{O}$ ), 147.4 (C), 146.8 (C), 140.9 (C), 138.0 (C), 133.4 (C), 125.3 (2 x CH), 123.0 (2 x CH), 121.6 (C), 60.6 ( $\text{CH}_2$ ,  $\text{OCH}_2\text{CH}_3$ ), 25.4 ( $\text{CH}_2$ ), 20.0 ( $\text{CH}_2$ ), 15.2 ( $\text{CH}_3$ , olefinic- $\text{CH}_3$ ), 14.3 ( $\text{CH}_3$ ,  $\text{OCH}_2\text{CH}_3$ ); HRMS (ESI-TOF)  $m/z$  329.1250 ( $\text{M} + \text{H}^+$ ), calcd for  $\text{C}_{16}\text{H}_{16}\text{N}_4\text{O}_4\text{H}$  329.1250.

**Ethyl 4-methyl-1-(3-nitrophenyl)-6,7-dihydro-1H-benzo[d][1,2,3]triazole-5-carboxylate**

**(6aj):** Prepared following the procedure A and purified by column chromatography using

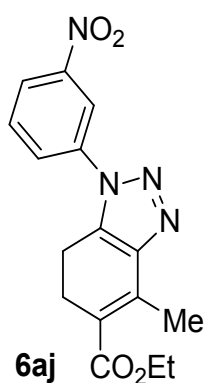

EtOAc/hexane (0.5:9.5 to 2:8) and was isolated as a white solid; Yield: 60% (99 mg); Mp.: 108-110 °C; IR (Neat):  $\nu_{\text{max}}$  2982, 1735, 1702, 1537, 1371, 1239, 1201, 1045, 779, 756, 677 and 607  $\text{cm}^{-1}$ ;  $^1\text{H}$  NMR (500 MHz,  $\text{CDCl}_3$ )  $\delta$  8.44 (1H, t,  $J = 2.0$  Hz), 8.37 (1H, ddd,  $J = 8.5$ , 2.0, 1.0 Hz), 8.01 (1H, ddd,  $J = 8.0$ , 2.0, 1.0 Hz), 7.80 (1H, t,  $J = 8.5$  Hz), 4.29 (2H, q,  $J = 7.0$  Hz,  $\text{OCH}_2\text{CH}_3$ ), 3.06 (2H, t,  $J = 9.0$  Hz), 2.91 (2H, qt,  $J = 9.0$ , 1.5 Hz), 2.64 (3H, t,  $J = 2.0$  Hz, olefinic- $\text{CH}_3$ ), 1.37 (3H, t,  $J = 7.0$  Hz,  $\text{OCH}_2\text{CH}_3$ );  $^{13}\text{C}$  NMR ( $\text{CDCl}_3$ , DEPT-135)  $\delta$  167.6 (C,  $\text{O}-\text{C}=\text{O}$ ), 148.8 (C), 146.6 (C), 138.0 (C), 137.1 (C), 133.5 (C), 130.9 (CH), 128.4 (CH), 123.6 (CH), 121.6 (C), 117.6 (CH), 60.5 ( $\text{CH}_2$ ,  $\text{OCH}_2\text{CH}_3$ ), 25.4 ( $\text{CH}_2$ ), 19.8 ( $\text{CH}_2$ ), 15.2 ( $\text{CH}_3$ , olefinic- $\text{CH}_3$ ), 14.3 ( $\text{CH}_3$ ,  $\text{OCH}_2\text{CH}_3$ ); HRMS (ESI-TOF)  $m/z$  329.1251 ( $\text{M} + \text{H}^+$ ), calcd for  $\text{C}_{16}\text{H}_{16}\text{N}_4\text{O}_4\text{H}$  329.1250.



**Ethyl 4-methyl-1-(naphthalen-1-yl)-6,7-dihydro-1H-benzo[d][1,2,3]triazole-5-carboxylate (6al):** Prepared following the procedure **A** and purified by column chromatography using EtOAc/hexane (0.5:9.5 to 2:8) and was isolated as a white semisolid; Yield: 87% (145.5 mg); IR (Neat):  $\nu_{\max}$  2976, 1707, 1593, 1512, 1445, 1350, 1242, 1190, 1128, 824 and 534  $\text{cm}^{-1}$ ;  $^1\text{H}$  NMR (500 MHz,  $\text{CDCl}_3$ )  $\delta$  8.04 (1H, d,  $J = 8.0$  Hz), 7.97 (1H, d,  $J = 8.0$  Hz), 7.61-7.56 (2H, m), 7.54-7.50 (2H, m), 7.41 (1H, d,  $J = 8.5$  Hz), 4.28 (2H, q,  $J = 7.0$  Hz,  $\text{OCH}_2\text{CH}_3$ ), 2.83 (2H, qt,  $J = 9.0, 1.5$  Hz), 2.71 (3H, t,  $J = 1.5$  Hz, olefinic- $\text{CH}_3$ ), 2.66 (2H, t,  $J = 9.0$  Hz), 1.35 (3H, t,  $J = 7.0$  Hz,  $\text{OCH}_2\text{CH}_3$ );  $^{13}\text{C}$  NMR ( $\text{CDCl}_3$ , DEPT-135)  $\delta$  167.9 (C,  $\text{O}-\text{C}=\text{O}$ ), 145.1 (C), 138.5 (C), 136.2 (C), 134.1 (C), 131.9 (C), 130.6 (CH), 128.88 (C), 128.87 (CH), 127.8 (CH), 127.0 (CH), 124.9 (CH), 124.2 (CH), 122.2 (CH), 121.0 (C), 60.3 ( $\text{CH}_2$ ,  $\text{OCH}_2\text{CH}_3$ ), 25.2 ( $\text{CH}_2$ ), 18.7 ( $\text{CH}_2$ ), 15.3 ( $\text{CH}_3$ , olefinic- $\text{CH}_3$ ), 14.3 ( $\text{CH}_3$ ,  $\text{OCH}_2\text{CH}_3$ ); HRMS (ESI-TOF)  $m/z$  334.1555 ( $\text{M} + \text{H}^+$ ), calcd for  $\text{C}_{20}\text{H}_{19}\text{N}_3\text{O}_2\text{H}$  334.1556.

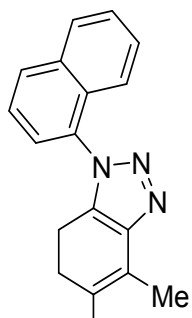

**6al**

**(2R,3R,4S,5S,6S)-2-(Acetoxymethyl)-6-(5-(ethoxycarbonyl)-4-methyl-6,7-dihydro-1H-benzo[d][1,2,3]triazol-1-yl)tetrahydro-2H-pyran-3,4,5-triyl triacetate (6am):** Prepared following the procedure **A** and purified by column chromatography using EtOAc/hexane (1:9 to 5:5) and was isolated as a semi solid; Yield: 69% (186.5 mg);  $[\alpha]_{\text{D}}^{25} = +7.63$  ( $C = 0.059$ ,  $\text{CHCl}_3$ ); IR (Neat):  $\nu_{\max}$  2981, 2359, 1745, 1699, 1367, 1209, 1048, 982, 903, 775, 599 and 504  $\text{cm}^{-1}$ ;  $^1\text{H}$  NMR (500 MHz,  $\text{CDCl}_3$ )  $\delta$  6.10-6.07 (1H, m), 5.96-5.93 (2H, m), 5.40 (1H, t,  $J = 10.0$  Hz), 4.32 (1H, dd,  $J = 12.5, 5.5$  Hz), 4.27 (2H, q,  $J = 7.0$  Hz,  $\text{OCH}_2\text{CH}_3$ ), 4.00 (1H, dd,  $J = 12.0, 2.0$  Hz), 3.84-3.82 (1H, m), 2.92-2.83 (4H, m), 2.58 (3H, s, olefinic- $\text{CH}_3$ ), 2.22 (3H, s,  $\text{COCH}_3$ ), 2.08 (3H, s,  $\text{COCH}_3$ ), 2.06 (3H, s,  $\text{COCH}_3$ ), 2.05 (3H, s,  $\text{COCH}_3$ ), 1.35 (3H, t,  $J = 7.0$  Hz,  $\text{OCH}_2\text{CH}_3$ );  $^{13}\text{C}$  NMR ( $\text{CDCl}_3$ , DEPT-135)  $\delta$  170.2 (C,  $\text{O}-\text{C}=\text{O}$ ), 169.8 (C,  $\text{O}-\text{C}=\text{O}$ ), 169.6 (C,  $\text{O}-\text{C}=\text{O}$ ), 169.1 (C,  $\text{O}-\text{C}=\text{O}$ ), 167.7 (C,  $\text{O}-\text{C}=\text{O}$ ), 145.9 (C), 137.8 (C), 134.7 (C), 121.5 (C), 82.3 (CH), 71.6 (CH), 68.8 (CH), 68.4 (CH), 66.0 (CH), 61.7 ( $\text{CH}_2$ ), 60.4 ( $\text{CH}_2$ ,  $\text{OCH}_2\text{CH}_3$ ), 25.0 ( $\text{CH}_2$ ), 20.7 ( $\text{CH}_3$ ,  $\text{COCH}_3$ ), 20.59 ( $\text{CH}_3$ ,  $\text{COCH}_3$ ), 20.57 ( $\text{CH}_3$ ,  $\text{COCH}_3$ ), 20.5 ( $\text{CH}_3$ ,  $\text{COCH}_3$ ), 18.3 ( $\text{CH}_2$ ), 15.1 ( $\text{CH}_3$ , olefinic- $\text{CH}_3$ ), 14.3 ( $\text{CH}_3$ ,  $\text{OCH}_2\text{CH}_3$ ); HRMS (ESI-TOF)  $m/z$  538.2037 ( $\text{M} + \text{H}^+$ ), calcd for  $\text{C}_{24}\text{H}_{31}\text{N}_3\text{O}_{11}\text{H}$  538.2037.

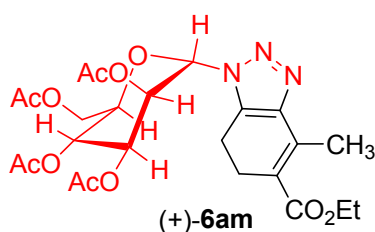

**(+)-6am**

**(2*R*,3*R*,4*S*,5*R*,6*R*)-2-(Acetoxymethyl)-6-(5-(ethoxycarbonyl)-4-methyl-6,7-dihydro-1*H*-benzo[d][1,2,3]triazol-1-yl)tetrahydro-2*H*-pyran-3,4,5-triyl triacetate (6an):** Prepared following the procedure **A** and purified by column chromatography using EtOAc/hexane (1:9

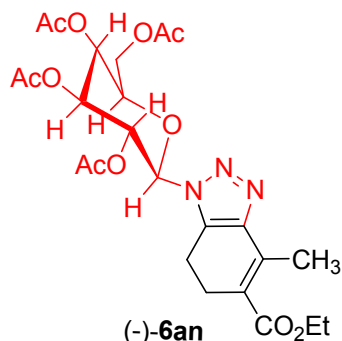

to 5:5) and was isolated as a semi solid; Yield: 72% (193.0 mg);  $[\alpha]_D^{25} = -8.18$  ( $C = 0.055$ ,  $\text{CHCl}_3$ ); IR (Neat):  $\nu_{\text{max}}$  2981, 1745, 1699, 1367, 1283, 1207, 1129, 1088, 1046, 982, 775 and 599  $\text{cm}^{-1}$ ;  $^1\text{H}$  NMR (500 MHz,  $\text{CDCl}_3$ )  $\delta$  5.87 (1H, td,  $J = 7.0, 2.0$  Hz), 5.46-5.40 (2H, m), 5.23 (1H, tt,  $J = 7.5, 2.0$  Hz), 4.30-4.24 (3H, m), 4.20 (1H, dd,  $J = 12.5, 2.0$  Hz), 3.99 (1H, ddd,  $J = 10.5, 5.0, 2.5$  Hz), 3.10-2.95 (2H, m), 2.86 (2H, m), 2.54 (3H, t,  $J = 1.5$  Hz, olefinic- $\text{CH}_3$ ), 2.086 (3H, s,  $\text{COCH}_3$ ), 2.084 (3H, s,  $\text{COCH}_3$ ), 2.04 (3H, s,  $\text{COCH}_3$ ), 1.88 (3H, s,  $\text{COCH}_3$ ), 1.34 (3H, t,  $J = 7.5$  Hz,  $\text{OCH}_2\text{CH}_3$ );  $^{13}\text{C}$  NMR ( $\text{CDCl}_3$ , DEPT-135)  $\delta$  170.3 (C,  $\text{O}-\text{C}=\text{O}$ ), 169.8 (C,  $\text{O}-\text{C}=\text{O}$ ), 169.4 (C,  $\text{O}-\text{C}=\text{O}$ ), 168.9 (C,  $\text{O}-\text{C}=\text{O}$ ), 167.8 (C,  $\text{O}-\text{C}=\text{O}$ ), 146.5 (C), 137.7 (C), 134.1 (C), 121.6 (C), 86.0 (CH), 75.1 (CH), 72.4 (CH), 69.4 (CH), 67.8 (CH), 61.5 ( $\text{CH}_2$ ), 60.4 ( $\text{CH}_2$ ,  $\text{OCH}_2\text{CH}_3$ ), 24.9 ( $\text{CH}_2$ ), 20.6 ( $\text{CH}_3$ ,  $\text{COCH}_3$ ), 20.49 ( $\text{CH}_3$ ,  $\text{COCH}_3$ ), 20.46 ( $\text{CH}_3$ ,  $\text{COCH}_3$ ), 20.1 ( $\text{CH}_3$ ,  $\text{COCH}_3$ ), 19.2 ( $\text{CH}_2$ ), 15.1 ( $\text{CH}_3$ , olefinic- $\text{CH}_3$ ), 14.3 ( $\text{CH}_3$ ,  $\text{OCH}_2\text{CH}_3$ ); HRMS (ESI-TOF)  $m/z$  538.2037 ( $\text{M} + \text{H}^+$ ), calcd for  $\text{C}_{24}\text{H}_{31}\text{N}_3\text{O}_{11}\text{H}$  538.2037.

**Ethyl 1-benzyl-4-methyl-6,7-dihydro-1*H*-benzo[d][1,2,3]triazole-5-carboxylate (6ao):**

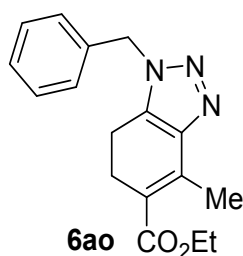

Prepared following the procedure **A** and purified by column chromatography using EtOAc/hexane (0.5:9.5 to 2:8) and was isolated as a colourless liquid; Yield: 70% (104.5 mg); IR (Neat):  $\nu_{\text{max}}$ , 2979, 1693, 1607, 1441, 1368, 1284, 1204, 1054, 906, 727 and 459  $\text{cm}^{-1}$ ;  $^1\text{H}$  NMR (500 MHz,  $\text{CDCl}_3$ )  $\delta$  7.37-7.32 (3H, m), 7.20-7.19 (2H, m), 5.49 (2H, s,  $\text{PhCH}_2\text{N}$ ), 4.29 (2H, q,  $J = 7.0$  Hz,  $\text{OCH}_2\text{CH}_3$ ), 2.75 (2H, t,  $J = 8.5$  Hz), 2.61 (2H, t,  $J = 8.5$  Hz), 2.57 (3H, br s, olefinic- $\text{CH}_3$ ), 1.32 (3H, t,  $J = 7.0$  Hz,  $\text{OCH}_2\text{CH}_3$ );  $^{13}\text{C}$  NMR ( $\text{CDCl}_3$ , DEPT-135)  $\delta$  168.0 (C,  $\text{O}-\text{C}=\text{O}$ ), 146.0 (C), 138.6 (C), 134.4 (C), 133.8 (C), 129.1 (2 x CH), 128.5 (CH), 127.5 (2 x CH), 120.5 (C), 60.3 ( $\text{CH}_2$ ,  $\text{OCH}_2\text{CH}_3$ ), 52.1 ( $\text{CH}_2$ ,  $\text{PhCH}_2\text{N}$ ), 25.1 ( $\text{CH}_2$ ), 18.5 ( $\text{CH}_2$ ), 15.1 ( $\text{CH}_3$ , olefinic- $\text{CH}_3$ ), 14.3 ( $\text{CH}_3$ ,  $\text{OCH}_2\text{CH}_3$ ); HRMS (ESI-TOF)  $m/z$  298.1557 ( $\text{M} + \text{H}^+$ ), calcd for  $\text{C}_{17}\text{H}_{19}\text{N}_3\text{O}_2\text{H}$  298.1556.

**Ethyl 4-methyl-1,6-diphenyl-6,7-dihydro-1H-benzo[d][1,2,3]triazole-5-carboxylate (7ba):**

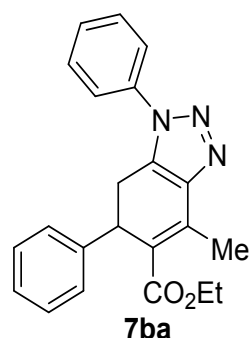

Prepared following the procedure **A** and purified by column chromatography using EtOAc/hexane (0.5:9.5 to 2:8) and was isolated as a white solid; Yield: 80% (143.5 mg); Mp.: 104-106 °C; IR (Neat):  $\nu_{\max}$  2917, 2849, 1684, 1596, 1503, 1364, 1225, 1203, 1079, 1031, 752, 700 and 602  $\text{cm}^{-1}$ ;  $^1\text{H}$  NMR (400 MHz,  $\text{CDCl}_3$ )  $\delta$  7.50-7.41 (5H, m), 7.21-7.15 (3H, m), 7.11 (2H, td,  $J = 6.4, 2.0$  Hz), 4.50 (1H, br dd,  $J = 9.2, 1.2$  Hz), 4.12 (2H, br q,  $J = 7.2$  Hz,  $\text{OCH}_2\text{CH}_3$ ), 3.50 (1H, dd,  $J = 16.8, 8.8$  Hz), 3.11 (1H, dd,  $J = 16.8, 2.8$  Hz), 2.77 (3H, d,  $J = 0.8$  Hz, olefinic- $\text{CH}_3$ ), 1.18 (3H, t,  $J = 7.2$  Hz,  $\text{OCH}_2\text{CH}_3$ );  $^{13}\text{C}$  NMR ( $\text{CDCl}_3$ , DEPT-135)  $\delta$  167.3 (C, O-C=O), 145.8 (C), 142.6 (C), 138.8 (C), 135.9 (C), 131.6 (C), 129.6 (2 x CH), 129.1 (CH), 128.6 (2 x CH), 126.95 (2 x CH), 126.91 (CH), 124.4 (C), 122.9 (2 x CH), 60.4 ( $\text{CH}_2$ ,  $\text{OCH}_2\text{CH}_3$ ), 41.4 (CH), 28.6 ( $\text{CH}_2$ ), 15.5 ( $\text{CH}_3$ , olefinic- $\text{CH}_3$ ), 14.0 ( $\text{CH}_3$ ,  $\text{OCH}_2\text{CH}_3$ ); HRMS (ESI-TOF)  $m/z$  360.1712 ( $\text{M} + \text{H}^+$ ), calcd for  $\text{C}_{22}\text{H}_{21}\text{N}_3\text{O}_2\text{H}$  360.1712.

**Ethyl 6-(4-chlorophenyl)-4-methyl-1-phenyl-6,7-dihydro-1H-benzo[d][1,2,3]triazole-5-carboxylate (7ca):**

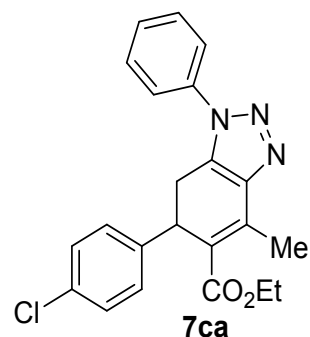

Prepared following the procedure **A** and purified by column chromatography using EtOAc/hexane (0.5:9.5 to 2:8) and was isolated as a yellow solid; Yield: 77% (151.1 mg); Mp.: 96-98 °C; IR (Neat):  $\nu_{\max}$  2983, 2919, 2852, 1699, 1508, 1484, 1284, 1191, 1084, 1033, 1011, 961, 763 and 724  $\text{cm}^{-1}$ ;  $^1\text{H}$  NMR (500 MHz,  $\text{CDCl}_3$ )  $\delta$  7.51-7.49 (2H, m), 7.48-7.44 (1H, m), 7.43-7.41 (2H, m), 7.15 (2H, td,  $J = 7.0, 2.5$  Hz), 7.03 (2H, td,  $J = 8.5, 2.0$  Hz), 4.48 (1H, br d,  $J = 8.0$  Hz), 4.14 (2H, q,  $J = 7.0$  Hz,  $\text{OCH}_2\text{CH}_3$ ), 3.50 (1H, dd,  $J = 17.0, 9.0$  Hz), 3.06 (1H, dd,  $J = 16.5, 2.5$  Hz), 2.77 (3H, s, olefinic- $\text{CH}_3$ ), 1.21 (3H, t,  $J = 7.0$  Hz,  $\text{OCH}_2\text{CH}_3$ );  $^{13}\text{C}$  NMR ( $\text{CDCl}_3$ , DEPT-135)  $\delta$  167.2 (C, O-C=O), 145.8 (C), 141.1 (C), 139.4 (C), 135.9 (C), 132.7 (C), 131.4 (C), 129.6 (2 x CH), 129.2 (CH), 128.8 (2 x CH), 128.4 (2 x CH), 123.9 (C), 122.9 (2 x CH), 60.5 ( $\text{CH}_2$ ,  $\text{OCH}_2\text{CH}_3$ ), 40.8 (CH), 28.6 ( $\text{CH}_2$ ), 15.5 ( $\text{CH}_3$ , olefinic- $\text{CH}_3$ ), 14.1 ( $\text{CH}_3$ ,  $\text{OCH}_2\text{CH}_3$ ); HRMS (ESI-TOF)  $m/z$  394.1323 ( $\text{M} + \text{H}^+$ ), calcd for  $\text{C}_{22}\text{H}_{20}\text{ClN}_3\text{O}_2\text{H}$  394.1322.

**Ethyl (R)-1,4,6-triphenyl-6,7-dihydro-1H-benzo[d][1,2,3]triazole-5-carboxylate (7da):**

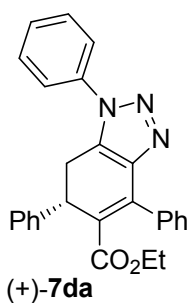

(+)-7da

Prepared following the procedure **A** and purified by column chromatography using EtOAc/hexane (0.5:9.5 to 2:8) and was isolated as a colourless liquid; Yield: 65% (136.5 mg);  $[\alpha]_D^{25} = +85.0$  ( $C = 0.140$ ,  $\text{CHCl}_3$ , 89.63% *ee*); IR (Neat):  $\nu_{\text{max}}$  3059, 2922, 2851, 1699, 1597, 1507, 1451, 1309, 1228, 1175, 1077, 762 and 724  $\text{cm}^{-1}$ ;  $^1\text{H}$  NMR (400 MHz,  $\text{CDCl}_3$ )  $\delta$  7.52–7.49 (3H, m), 7.48–7.39 (7H, m), 7.28–7.26 (4H, m), 7.24–7.19 (1H, m), 4.54 (1H, dd,  $J = 8.8, 4.0$  Hz), 3.86–3.78 (2H, m,  $\text{OCH}_2\text{CH}_3$ ), 3.62 (1H, dd,  $J = 16.8, 8.8$  Hz), 3.22 (1H, dd,  $J = 16.8, 4.0$  Hz), 0.77 (3H, t,  $J = 7.2$  Hz,  $\text{OCH}_2\text{CH}_3$ );  $^{13}\text{C}$  NMR ( $\text{CDCl}_3$ , DEPT-135)  $\delta$  168.0 (C, O-C=O), 144.7 (C), 141.8 (C), 139.2 (C), 135.95 (C), 135.91 (C), 131.8 (C), 129.6 (2 x CH), 129.2 (CH), 128.8 (2 x CH), 128.6 (2 x CH), 128.2 (CH), 128.0 (2 x CH), 127.3 (CH), 127.1 (2 x CH), 126.8 (C), 123.1 (2 x CH), 60.5 ( $\text{CH}_2$ ,  $\text{OCH}_2\text{CH}_3$ ), 42.5 (CH), 28.8 ( $\text{CH}_2$ ), 13.3 ( $\text{CH}_3$ ,  $\text{OCH}_2\text{CH}_3$ ); HRMS (ESI-TOF)  $m/z$  422.1869 ( $\text{M} + \text{H}^+$ ), calcd for  $\text{C}_{27}\text{H}_{23}\text{N}_3\text{O}_2\text{H}$  422.1869.

**Ethyl 4-methyl-6-(4-nitrophenyl)-1-phenyl-1H-benzo[d][1,2,3]triazole-5-carboxylate (7ea):**

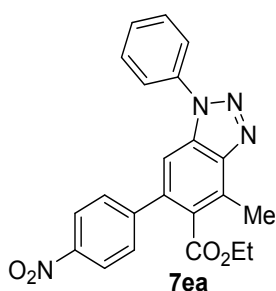

7ea

Prepared following the procedure **A** and purified by column chromatography using EtOAc/hexane (0.5:9.5 to 2:8) and was isolated as a yellow solid; Yield: 37% (74 mg); Mp.: 118–120 °C; IR (Neat):  $\nu_{\text{max}}$  2922, 1720, 1513, 1435, 1302, 1083, 1053, 994 and 854  $\text{cm}^{-1}$ ;  $^1\text{H}$  NMR (500 MHz,  $\text{CDCl}_3$ )  $\delta$  8.28 (2H, d,  $J = 8.5$  Hz), 7.77 (2H, td,  $J = 7.5, 1.5$  Hz), 7.63 (2H, t,  $J = 7.5$  Hz), 7.59 (2H, td,  $J = 8.5, 2.0$  Hz), 7.55–7.53 (2H, m), 4.12 (2H, q,  $J = 7.5$  Hz,  $\text{OCH}_2\text{CH}_3$ ), 2.96 (3H, s, Ar- $\text{CH}_3$ ), 1.04 (3H, t,  $J = 7.0$  Hz,  $\text{OCH}_2\text{CH}_3$ );  $^{13}\text{C}$  NMR ( $\text{CDCl}_3$ , DEPT-135)  $\delta$  168.1 (C, O-C=O), 147.4 (2 x C), 145.9 (C), 138.9 (C), 136.5 (C), 132.0 (C), 131.1 (C), 130.0 (2 x CH), 129.5 (2 x CH), 129.4 (C), 129.1 (CH), 123.5 (2 x CH), 123.0 (2 x CH), 108.8 (CH), 61.5 ( $\text{CH}_2$ ,  $\text{OCH}_2\text{CH}_3$ ), 14.5 ( $\text{CH}_3$ ), 13.8 ( $\text{CH}_3$ ); HRMS (ESI-TOF)  $m/z$  403.1406 ( $\text{M} + \text{H}^+$ ), calcd for  $\text{C}_{22}\text{H}_{18}\text{N}_4\text{O}_4\text{H}$  403.1406.

**Ethyl 6-ethyl-4-methyl-1-phenyl-6,7-dihydro-1H-benzo[d][1,2,3]triazole-5-carboxylate (7fa):**

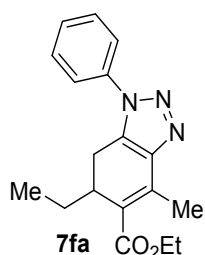

7fa

Prepared following the procedure **A** and purified by column chromatography using EtOAc/hexane (0.5:9.5 to 2:8) and was isolated as a colourless liquid; Yield: 82% (128 mg); IR (Neat):  $\nu_{\text{max}}$  2961, 2926, 1693, 1599, 1508, 1454, 1367, 1249, 1191, 1131, 1050, 761 and 693  $\text{cm}^{-1}$ ;  $^1\text{H}$  NMR (400 MHz,  $\text{CDCl}_3$ )  $\delta$  7.57–7.54 (4H, m), 7.52–7.48 (1H, m), 4.32–4.24

(2H, m, OCH<sub>2</sub>CH<sub>3</sub>), 3.17-3.05 (2H, m), 2.94 (1H, dd, *J* = 16.4, 1.2 Hz), 2.64 (3H, s, olefinic-CH<sub>3</sub>), 1.55-1.45 (1H, m), 1.36 (3H, t, *J* = 7.2 Hz, OCH<sub>2</sub>CH<sub>3</sub>), 1.31-1.26 (1H, m), 0.80 (3H, t, *J* = 7.6 Hz, CH<sub>2</sub>CH<sub>3</sub>); <sup>13</sup>C NMR (CDCl<sub>3</sub>, DEPT-135) δ 167.9 (C, O-C=O), 145.4 (C), 137.4 (C), 136.0 (C), 132.5 (C), 129.6 (2 x CH), 129.0 (CH), 126.2 (C), 122.9 (2 x CH), 60.3 (CH<sub>2</sub>, OCH<sub>2</sub>CH<sub>3</sub>), 37.0 (CH), 26.1 (CH<sub>2</sub>), 23.5 (CH<sub>2</sub>), 15.5 (CH<sub>3</sub>, olefinic-CH<sub>3</sub>), 14.2 (CH<sub>3</sub>, OCH<sub>2</sub>CH<sub>3</sub>), 11.3 (CH<sub>3</sub>, CH<sub>2</sub>CH<sub>3</sub>); HRMS (ESI-TOF) *m/z* 312.1713 (M + H<sup>+</sup>), calcd for C<sub>18</sub>H<sub>21</sub>N<sub>3</sub>O<sub>2</sub>H 312.1712.

**Ethyl (*E*)-3-(5-methyl-1-phenyl-1*H*-1,2,3-triazol-4-yl)acrylate (**9aa**):** Prepared following

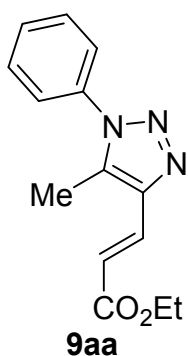

the procedure **A** and purified by column chromatography using EtOAc/hexane (0.5:9.5 to 2:8) and was isolated as a white solid; Yield: 83% (107 mg); Mp.: 108-110 °C; IR (Neat):  $\nu_{\text{max}}$  2978, 2924, 1705, 1650, 1595, 1501, 1292, 1166, 1131, 1024, 979, 766, 722, 690 and 577 cm<sup>-1</sup>; <sup>1</sup>H NMR (500 MHz, CDCl<sub>3</sub>) δ 7.65 (1H, d, *J* = 16.0 Hz, olefinic-*H*), 7.59-7.54 (3H, m), 7.47-7.45 (2H, m), 6.81 (1H, d, *J* = 16.0 Hz, olefinic-*H*), 4.28 (2H, q, *J* = 7.0 Hz, OCH<sub>2</sub>CH<sub>3</sub>), 2.42 (3H, s), 1.35 (3H, t, *J* = 7.0 Hz, OCH<sub>2</sub>CH<sub>3</sub>); <sup>13</sup>C

NMR (CDCl<sub>3</sub>, DEPT-135) δ 167.0 (C, O-C=O), 140.8 (C), 135.9 (C), 133.3 (C), 131.7 (CH), 129.7 (CH), 129.6 (2 x CH), 125.0 (2 x CH), 119.2 (CH), 60.5 (CH<sub>2</sub>, OCH<sub>2</sub>CH<sub>3</sub>), 14.3 (CH<sub>3</sub>, OCH<sub>2</sub>CH<sub>3</sub>), 9.2 (CH<sub>3</sub>); HRMS (ESI-TOF) *m/z* 258.1243 (M + H<sup>+</sup>), calcd for C<sub>14</sub>H<sub>15</sub>N<sub>3</sub>O<sub>2</sub>H 258.1243.

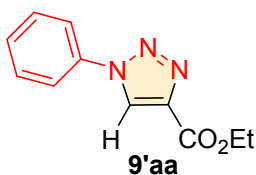

**Ethyl 1-phenyl-1*H*-1,2,3-triazole-4-carboxylate (**9'aa**):**<sup>3,4</sup> Obtained as byproduct along with product **9aa** in 2-3%; <sup>1</sup>H NMR (500 MHz, CDCl<sub>3</sub>) δ 8.52 (1H, s), 7.76 (2H, br d, *J* = 7.6 Hz), 7.60-7.50 (3H, m), 4.47 (2H, q, *J* = 7.0 Hz, OCH<sub>2</sub>CH<sub>3</sub>), 1.44 (3H, t, *J* = 7.0 Hz,

OCH<sub>2</sub>CH<sub>3</sub>).

**Ethyl (*E*)-3-(5-methyl-1-(*p*-tolyl)-1*H*-1,2,3-triazol-4-yl)acrylate (**9ab**):** Prepared following

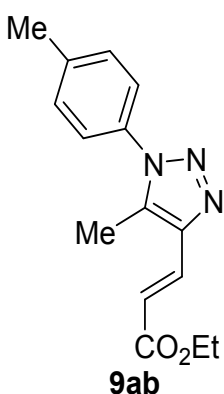

the procedure **A** and purified by column chromatography using EtOAc/hexane (0.5:9.5 to 2:8) and was isolated as a white semi solid; Yield: 81% (110 mg); IR (Neat):  $\nu_{\text{max}}$  2980, 2925, 1706, 1647, 1517, 1297, 1222, 1208, 1164, 1035, 1008, 870, 820, 733, 703, 564 and 509 cm<sup>-1</sup>; <sup>1</sup>H NMR (500 MHz, CDCl<sub>3</sub>) δ 7.65 (1H, d, *J* = 16.0 Hz, olefinic-*H*), 7.36-7.32 (4H, m), 6.79 (1H, d, *J* = 15.5 Hz, olefinic-*H*), 4.28 (2H, q, *J* = 7.0 Hz, OCH<sub>2</sub>CH<sub>3</sub>), 2.45 (3H, s, Ar-CH<sub>3</sub>), 2.40 (3H, s), 1.34 (3H, t, *J* = 7.0 Hz, OCH<sub>2</sub>CH<sub>3</sub>); <sup>13</sup>C NMR (CDCl<sub>3</sub>, DEPT-135) δ 167.0 (C, O-

C=O), 140.6 (C), 139.9 (2 x C), 133.3 (C), 131.8 (CH), 130.1 (2 x CH), 124.8 (2 x CH), 118.9 (CH), 60.4 (CH<sub>2</sub>, OCH<sub>2</sub>CH<sub>3</sub>), 21.1 (CH<sub>3</sub>, Ar-CH<sub>3</sub>), 14.2 (CH<sub>3</sub>, OCH<sub>2</sub>CH<sub>3</sub>), 9.1 (CH<sub>3</sub>); HRMS (ESI-TOF) *m/z* 272.1399 (M + H<sup>+</sup>), calcd for C<sub>15</sub>H<sub>17</sub>N<sub>3</sub>O<sub>2</sub>H 272.1399.

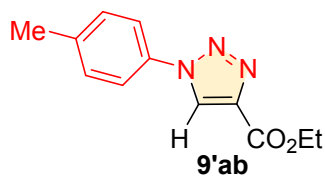

**Ethyl 1-(*p*-tolyl)-1*H*-1,2,3-triazole-4-carboxylate (9'ab):**<sup>3,4</sup>

Obtained as byproduct along with product **9ab** in 3-5%; <sup>1</sup>H NMR (500 MHz, CDCl<sub>3</sub>) δ 8.50 (1H, s), 7.63 (2H, m), 7.35 (2H, m), 4.45 (2H, q, *J* = 7.0 Hz, OCH<sub>2</sub>CH<sub>3</sub>), 2.43 (3H, s, Ar-CH<sub>3</sub>), 1.43 (3H, t, *J* = 7.0 Hz, OCH<sub>2</sub>CH<sub>3</sub>); <sup>13</sup>C NMR (CDCl<sub>3</sub>, DEPT-135) δ 160.6 (C, O-C=O), 140.6 (C), 139.7 (C), 134.0 (C), 130.3 (2 x CH), 125.4 (CH), 120.6 (2 x CH), 61.2 (CH<sub>2</sub>, OCH<sub>2</sub>CH<sub>3</sub>), 21.0 (CH<sub>3</sub>, Ar-CH<sub>3</sub>), 14.2 (CH<sub>3</sub>, OCH<sub>2</sub>CH<sub>3</sub>); HRMS (ESI-TOF) *m/z* 254.0904 (M + Na<sup>+</sup>), calcd for C<sub>12</sub>H<sub>13</sub>N<sub>3</sub>O<sub>2</sub>Na 254.0905.

**Ethyl (E)-3-(1-(4-methoxyphenyl)-5-methyl-1*H*-1,2,3-triazol-4-yl)acrylate (9ac):**

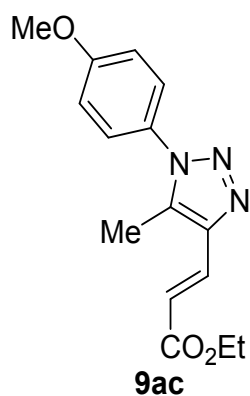

Prepared following the procedure **A** and purified by column chromatography using EtOAc/hexane (0.5:9.5 to 2:8) and was isolated as a orange solid; Yield: 71% (102); Mp.: 80-82 °C; IR (Neat):  $\nu_{\max}$  2923, 2851, 1708, 1648, 1517, 1300, 1253, 1174, 1035, 977, 836 and 735 cm<sup>-1</sup>; <sup>1</sup>H NMR (500 MHz, CDCl<sub>3</sub>) δ 7.65 (1H, d, *J* = 16.0 Hz, olefinic-*H*), 7.36 (2H, td, *J* = 9.0, 3.5 Hz), 7.05 (2H, td, *J* = 9.0, 3.5 Hz), 6.79 (1H, d, *J* = 16.0 Hz, olefinic-*H*), 4.28 (2H, q, *J* = 7.0 Hz, OCH<sub>2</sub>CH<sub>3</sub>), 3.89 (3H, s, OCH<sub>3</sub>), 2.38 (3H, s), 1.35 (3H, t, *J* = 7.0 Hz, OCH<sub>2</sub>CH<sub>3</sub>); <sup>13</sup>C NMR (CDCl<sub>3</sub>, DEPT-135) δ 167.1 (C, O-C=O), 160.5 (C), 140.5 (C), 133.5 (C), 131.9 (CH), 128.7 (C), 126.4 (2 x CH), 118.9 (CH), 114.7 (2 x CH), 60.5 (CH<sub>2</sub>, OCH<sub>2</sub>CH<sub>3</sub>), 55.6 (CH<sub>3</sub>, OCH<sub>3</sub>), 14.3 (CH<sub>3</sub>, OCH<sub>2</sub>CH<sub>3</sub>), 9.1 (CH<sub>3</sub>); HRMS (ESI-TOF) *m/z* 288.1347 (M + H<sup>+</sup>), calcd for C<sub>15</sub>H<sub>17</sub>N<sub>3</sub>O<sub>3</sub>H 288.1348.

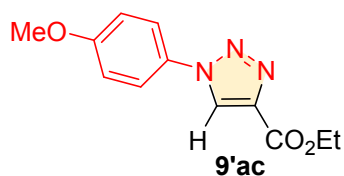

**Ethyl 1-(4-methoxyphenyl)-1*H*-1,2,3-triazole-4-carboxylate (9'ac):**<sup>3,4</sup>

Obtained as byproduct along with product **9ac** in 2-3%; <sup>1</sup>H NMR (500 MHz, CDCl<sub>3</sub>) δ 8.41 (1H, s), 7.63 (2H, m), 7.05 (2H, m), 4.45 (2H, q, *J* = 7.0 Hz, OCH<sub>2</sub>CH<sub>3</sub>), 3.87 (3H, s, Ar-OCH<sub>3</sub>), 1.43 (3H, t, *J* = 7.0 Hz, OCH<sub>2</sub>CH<sub>3</sub>); <sup>13</sup>C NMR (CDCl<sub>3</sub>, DEPT-135) δ 160.7 (C, O-C=O), 160.4 (C), 140.6 (C), 129.7 (C), 125.6 (CH), 122.5 (2 x CH), 114.9 (2 x CH), 61.2 (CH<sub>2</sub>, OCH<sub>2</sub>CH<sub>3</sub>), 55.6 (CH<sub>3</sub>, Ar-OCH<sub>3</sub>), 14.3 (CH<sub>3</sub>, OCH<sub>2</sub>CH<sub>3</sub>); HRMS (ESI-TOF) *m/z* 248.1032 (M + H<sup>+</sup>), calcd for C<sub>12</sub>H<sub>13</sub>N<sub>3</sub>O<sub>2</sub>H 248.1035.

**Ethyl (*E*)-3-(5-methyl-1-(naphthalen-1-yl)-1*H*-1,2,3-triazol-4-yl)acrylate (**9al**):** Prepared

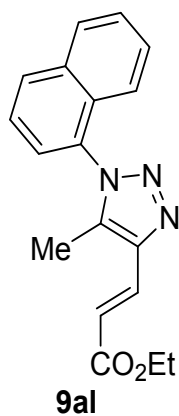

following the procedure **A** and purified by column chromatography using EtOAc/hexane (0.5:9.5 to 2:8) and was isolated as a colourless liquid; Yield: 78% (120 mg); IR (Neat):  $\nu_{\max}$  3059, 2979, 2926, 1705, 1647, 1597, 1440, 1296, 1230, 1188, 1161, 1034, 975, 803 and 773  $\text{cm}^{-1}$ ;  $^1\text{H}$  NMR (400 MHz,  $\text{CDCl}_3$ )  $\delta$  8.07 (1H, d,  $J = 8.4$  Hz), 7.98 (1H, d,  $J = 8.4$  Hz), 7.73 (1H, d,  $J = 16.0$  Hz, olefinic-*H*), 7.64-7.56 (2H, m), 7.51 (2H, t,  $J = 8.8$  Hz), 7.19 (1H, d,  $J = 8.4$  Hz), 6.87 (1H, d,  $J = 15.6$  Hz, olefinic-*H*), 4.50 (2H, q,  $J = 7.2$  Hz,  $\text{OCH}_2\text{CH}_3$ ), 2.22 (3H, s), 1.46 (3H, t,  $J = 7.2$  Hz,  $\text{OCH}_2\text{CH}_3$ );  $^{13}\text{C}$  NMR ( $\text{CDCl}_3$ , DEPT-135)  $\delta$  166.9 (C, O-C=O), 140.1 (C), 135.4 (C), 134.1 (C), 131.82 (C), 131.76 (CH), 130.9 (CH), 129.4 (C), 128.3 (CH), 128.0 (CH), 127.1 (CH), 125.05 (CH), 125.0 (CH), 121.9 (CH), 119.1 (CH), 60.5 ( $\text{CH}_2$ ,  $\text{OCH}_2\text{CH}_3$ ), 14.2 ( $\text{CH}_3$ ,  $\text{OCH}_2\text{CH}_3$ ), 8.5 ( $\text{CH}_3$ ); HRMS (ESI-TOF)  $m/z$  308.1399 ( $\text{M} + \text{H}^+$ ), calcd for  $\text{C}_{18}\text{H}_{17}\text{N}_3\text{O}_2\text{H}$  308.1399.

**Ethyl (*E*)-3-(1-(4-chlorophenyl)-5-methyl-1*H*-1,2,3-triazol-4-yl)acrylate (**9ap**):** Prepared

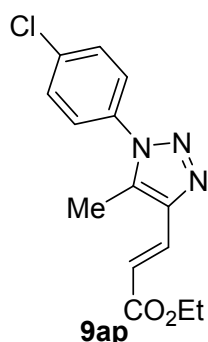

following the procedure **A** and purified by column chromatography using (0.5:9.5 to 2:8) and was isolated as a white solid; Yield: 88% (128.5 mg); Mp.: 106-108  $^\circ\text{C}$ ; IR (neat):  $\nu_{\max}$  2993, 1717, 1651, 1497, 1300, 1169, 1109, 1005, 832, 748 and 518  $\text{cm}^{-1}$ ;  $^1\text{H}$  NMR (400 MHz,  $\text{CDCl}_3$ )  $\delta$  7.63 (1H, d,  $J = 15.6$  Hz, olefinic-*H*), 7.55 (2H, td,  $J = 8.8, 2.8$  Hz), 7.42 (2H, td,  $J = 8.8, 2.0$  Hz), 6.81 (1H, d,  $J = 15.6$  Hz, olefinic-*H*), 4.28 (2H, q,  $J = 7.2$  Hz,  $\text{OCH}_2\text{CH}_3$ ), 2.42 (3H, s), 1.35 (3H, t,  $J = 7.2$  Hz,  $\text{OCH}_2\text{CH}_3$ );  $^{13}\text{C}$  NMR ( $\text{CDCl}_3$ , DEPT-135)  $\delta$  166.9 (C, O-C=O), 141.0 (C), 135.8 (C), 134.3 (C), 133.2 (C), 131.4 (CH), 129.9 (2 x CH), 126.2 (2 x CH), 119.4 (CH), 60.6 ( $\text{CH}_2$ ,  $\text{OCH}_2\text{CH}_3$ ), 14.3 ( $\text{CH}_3$ ,  $\text{OCH}_2\text{CH}_3$ ), 9.2 ( $\text{CH}_3$ ); HRMS (ESI-TOF)  $m/z$  292.0853 ( $\text{M} + \text{H}^+$ ), calcd for  $\text{C}_{14}\text{H}_{14}\text{ClN}_3\text{O}_2\text{H}$  292.0853.

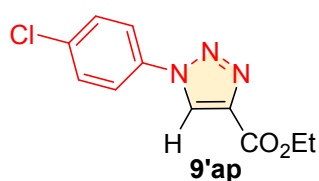

**Ethyl 1-(4-chlorophenyl)-1*H*-1,2,3-triazole-4-carboxylate (**9'ap**):**<sup>3,4</sup> Obtained as byproduct along with product **9ap** in 2-3%;  $^1\text{H}$  NMR (400 MHz,  $\text{CDCl}_3$ )  $\delta$  8.50 (1H, s), 7.72 (2H, td,  $J = 8.8, 2.8$  Hz), 7.53 (2H, td,  $J = 8.8, 2.8$  Hz), 4.45 (2H, q,  $J = 7.0$  Hz,  $\text{OCH}_2\text{CH}_3$ ), 1.42 (3H, t,  $J = 7.0$  Hz,  $\text{OCH}_2\text{CH}_3$ ).



**Ethyl (*E*)-3-(1-(3-chlorophenyl)-5-methyl-1*H*-1,2,3-triazol-4-yl)acrylate (**9aq**):** Prepared

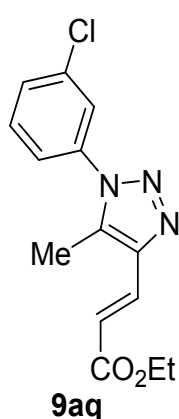

following the procedure **A** and purified by column chromatography using EtOAc/hexane (0.5:9.5 to 2:8) and was isolated as a white solid; Yield: 86% (124.5 mg); Mp.: 90-92 °C; IR (Neat):  $\nu_{\text{max}}$  2980, 1706, 1648, 1549, 1298, 1252, 1221, 1172, 1034, 976, 835, 786 and 685  $\text{cm}^{-1}$ ;  $^1\text{H}$  NMR (500 MHz,  $\text{CDCl}_3$ )  $\delta$  7.62 (1H, d,  $J = 16.0$  Hz, olefinic-*H*), 7.53-7.51 (3H, m), 7.39-7.37 (1H, m), 6.80 (1H, d,  $J = 15.5$  Hz, olefinic-*H*), 4.28 (2H, q,  $J = 7.0$  Hz,  $\text{OCH}_2\text{CH}_3$ ), 2.44 (3H, s), 1.35 (3H, t,  $J = 7.0$  Hz,  $\text{OCH}_2\text{CH}_3$ );  $^{13}\text{C}$  NMR ( $\text{CDCl}_3$ , DEPT-135)  $\delta$  166.8 (C, O-C=O), 141.0 (C), 136.7 (C), 135.4 (C), 133.2 (C), 131.2 (CH), 130.6 (CH), 129.9 (CH), 125.2 (CH), 123.0 (CH), 119.5 (CH), 60.5 ( $\text{CH}_2$ ,  $\text{OCH}_2\text{CH}_3$ ), 14.2 ( $\text{CH}_3$ ,  $\text{OCH}_2\text{CH}_3$ ), 9.2 ( $\text{CH}_3$ ); HRMS (ESI-TOF)  $m/z$  292.0855 ( $\text{M} + \text{H}^+$ ), calcd for  $\text{C}_{14}\text{H}_{14}\text{ClN}_3\text{O}_2\text{H}$  292.0853.

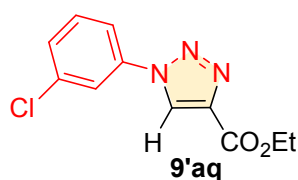

**Ethyl 1-(3-chlorophenyl)-1*H*-1,2,3-triazole-4-carboxylate (**9'aq**):**<sup>3,4</sup> Obtained as byproduct along with product **9aq** in 2-3%;  $^1\text{H}$  NMR (500 MHz,  $\text{CDCl}_3$ )  $\delta$  8.54 (1H, s), 7.83 (1H, t,  $J = 8.8$  Hz), 7.68 (1H, m), 7.53-7.46 (2H, m), 4.47 (2H, q,  $J = 7.0$  Hz,  $\text{OCH}_2\text{CH}_3$ ), 1.45 (3H, t,  $J = 7.0$  Hz,  $\text{OCH}_2\text{CH}_3$ );  $^{13}\text{C}$  NMR ( $\text{CDCl}_3$ , DEPT-135)  $\delta$  four quaternary carbons are not appeared, 131.0 (CH), 129.5 (CH), 125.3 (CH), 121.0 (CH), 118.7 (CH), 61.6 ( $\text{CH}_2$ ,  $\text{OCH}_2\text{CH}_3$ ), 14.2 ( $\text{CH}_3$ ,  $\text{OCH}_2\text{CH}_3$ ); HRMS (ESI-TOF)  $m/z$  252.0548 ( $\text{M} + \text{H}^+$ ), calcd for  $\text{C}_{11}\text{H}_{10}\text{ClN}_3\text{O}_2\text{H}$  252.0540.

**Ethyl (*E*)-3-(1-(2-chlorophenyl)-5-methyl-1*H*-1,2,3-triazol-4-yl)acrylate (**9ar**):** Prepared

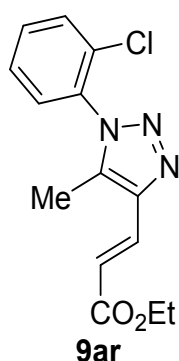

following the procedure **A** and purified by column chromatography using EtOAc/hexane (0.5:9.5 to 2:8) and was isolated as a colourless liquid; Yield: 40% (58 mg); IR (Neat):  $\nu_{\text{max}}$  2925, 1709, 1650, 1497, 1301, 1264, 1177, 1034, 977 and 703  $\text{cm}^{-1}$ ;  $^1\text{H}$  NMR (400 MHz,  $\text{CDCl}_3$ )  $\delta$  7.66 (1H, d,  $J = 15.6$  Hz, olefinic-*H*), 7.63-7.60 (1H, m), 7.55 (1H, dt,  $J = 8.0, 2.0$  Hz), 7.52-7.48 (1H, m), 7.45 (1H, dt,  $J = 8.0, 2.0$  Hz), 6.81 (1H, d,  $J = 16.0$  Hz, olefinic-*H*), 4.29 (2H, q,  $J = 7.2$  Hz,  $\text{OCH}_2\text{CH}_3$ ), 2.29 (3H, s), 1.35 (3H, t,  $J = 7.2$  Hz,  $\text{OCH}_2\text{CH}_3$ );  $^{13}\text{C}$  NMR ( $\text{CDCl}_3$ , DEPT-135)  $\delta$  167.0 (C, O-C=O), 140.2 (C), 135.2 (C), 133.5 (C), 131.9 (CH), 131.7 (C), 131.6 (CH), 130.6 (CH), 129.2 (CH), 128.0 (CH), 119.3 (CH), 60.6 ( $\text{CH}_2$ ,  $\text{OCH}_2\text{CH}_3$ ), 14.3 ( $\text{CH}_3$ ,  $\text{OCH}_2\text{CH}_3$ ), 8.5 ( $\text{CH}_3$ ); HRMS (ESI-TOF)  $m/z$  292.0856 ( $\text{M} + \text{H}^+$ ), calcd for  $\text{C}_{14}\text{H}_{14}\text{ClN}_3\text{O}_2\text{H}$  292.0853.

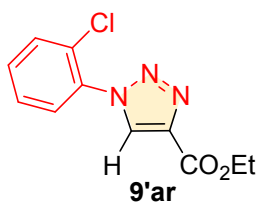

**Ethyl 1-(2-chlorophenyl)-1H-1,2,3-triazole-4-carboxylate (9'ar):**<sup>3,4</sup>

Obtained as byproduct along with product **9ar** in 2-3%; <sup>1</sup>H NMR (400 MHz, CDCl<sub>3</sub>) δ 8.54 (1H, s), 7.66-7.61 (2H, m), 7.54-7.47 (2H, m), 4.47 (2H, q, *J* = 7.0 Hz, OCH<sub>2</sub>CH<sub>3</sub>), 1.45 (3H, t, *J* = 7.0 Hz, OCH<sub>2</sub>CH<sub>3</sub>); <sup>13</sup>C NMR (CDCl<sub>3</sub>, DEPT-135) δ four quaternary carbons are not appeared, 131.4 (CH), 130.9 (CH), 129.5 (CH), 128.1 (CH), 127.7 (CH), 61.6 (CH<sub>2</sub>, OCH<sub>2</sub>CH<sub>3</sub>), 14.3 (CH<sub>3</sub>, OCH<sub>2</sub>CH<sub>3</sub>); HRMS (ESI-TOF) *m/z* 274.0364 (M + Na<sup>+</sup>), calcd for C<sub>11</sub>H<sub>10</sub>ClN<sub>3</sub>O<sub>2</sub>Na 274.0359.

**Ethyl (E)-3-(1-(4-cyanophenyl)-5-methyl-1H-1,2,3-triazol-4-yl)acrylate (9as):** Prepared

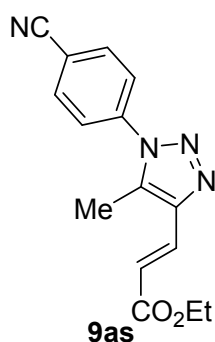

following the procedure **A** and purified by column chromatography using (0.5:9.5 to 2:8) and was isolated as a white solid; Yield: 86% (121.5 mg); Mp.: 158-160 °C; IR (neat):  $\nu_{\max}$  2982, 2923, 2230, 1708, 1649, 1606, 1512, 1300, 1273, 1221, 1172, 1305, 977, 750 and 577 cm<sup>-1</sup>; <sup>1</sup>H NMR (500 MHz, CDCl<sub>3</sub>) δ 7.91 (2H, dd, *J* = 8.5, 1.5 Hz), 7.70 (2H, d, *J* = 8.5 Hz), 7.61 (1H, br d, *J* = 16.0 Hz, olefinic-*H*), 6.80 (1H, br d, *J* = 15.5 Hz, olefinic-*H*), 4.28 (2H, q, *J* = 7.0 Hz, OCH<sub>2</sub>CH<sub>3</sub>), 2.50 (3H, s), 1.35 (3H, t, *J* = 7.0 Hz, OCH<sub>2</sub>CH<sub>3</sub>); <sup>13</sup>C NMR (CDCl<sub>3</sub>, DEPT-135) δ 166.6 (C, O-C=O), 141.3 (C), 139.0 (C), 133.5 (2 x CH), 133.0 (C), 130.8 (CH), 125.0 (2 x CH), 119.7 (CH), 117.4 (C), 113.3 (C), 60.5 (CH<sub>2</sub>, OCH<sub>2</sub>CH<sub>3</sub>), 14.1 (CH<sub>3</sub>, OCH<sub>2</sub>CH<sub>3</sub>), 9.2 (CH<sub>3</sub>); HRMS (ESI-TOF) *m/z* 283.1191 (M + H<sup>+</sup>), calcd for C<sub>15</sub>H<sub>14</sub>N<sub>4</sub>O<sub>2</sub>H 283.1191.

**Ethyl (E)-3-(5-methyl-1-(1-phenylvinyl)-1H-1,2,3-triazol-4-yl)acrylate (10aa):** Prepared

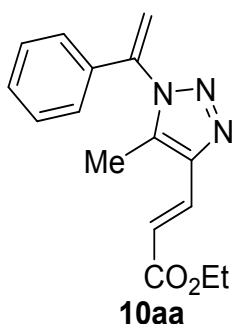

following the procedure **A** and purified by column chromatography using EtOAc/hexane (0.5:9.5 to 2:8) and was isolated as a colourless liquid; Yield: 86% (118.5 mg); IR (Neat):  $\nu_{\max}$  2980, 2359, 1709, 1646, 1370, 1298, 1261, 1184, 1094, 914, 755, 722, 697 and 524 cm<sup>-1</sup>; <sup>1</sup>H NMR (500 MHz, CDCl<sub>3</sub>) δ 7.61 (1H, d, *J* = 15.5 Hz, olefinic-*H*), 7.40-7.35 (3H, m), 7.18-7.16 (2H, m), 6.80 (1H, d, *J* = 16.0 Hz, olefinic-*H*), 5.98 (1H, d, *J* = 1.0 Hz, olefinic-*H*), 5.60 (1H, d, *J* = 1.0 Hz, olefinic-*H*), 4.27 (2H, q, *J* = 7.0 Hz, OCH<sub>2</sub>CH<sub>3</sub>), 2.15 (3H, s), 1.34 (3H, t, *J* = 7.0 Hz, OCH<sub>2</sub>CH<sub>3</sub>); <sup>13</sup>C NMR (CDCl<sub>3</sub>, DEPT-135) δ 166.9 (C, O-C=O), 142.0 (C), 140.4 (C), 134.3 (C), 133.9 (C), 131.5 (CH), 129.8 (CH), 129.0 (2 x CH), 125.6 (2 x CH), 119.1 (CH), 114.5 (CH<sub>2</sub>), 60.5 (CH<sub>2</sub>, OCH<sub>2</sub>CH<sub>3</sub>), 14.2

(CH<sub>3</sub>, OCH<sub>2</sub>CH<sub>3</sub>), 8.7 (CH<sub>3</sub>); HRMS (ESI-TOF) *m/z* 306.1218 (M + Na<sup>+</sup>), calcd for C<sub>16</sub>H<sub>17</sub>N<sub>3</sub>O<sub>2</sub>Na 306.1218.

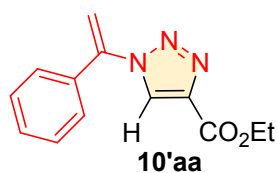

**Ethyl 1-(1-phenylvinyl)-1H-1,2,3-triazole-4-carboxylate (10'aa):**

Obtained as byproduct along with product **10aa** in 2-3%; <sup>1</sup>H NMR (400 MHz, CDCl<sub>3</sub>) δ 8.1 (1H, s), 7.50-7.30 (5H, m), 5.9 (1H, s, olefinic-H), 5.61 (1H, s, olefinic-H), 4.43 (2H, q, *J* = 7.0 Hz, OCH<sub>2</sub>CH<sub>3</sub>), 1.42 (3H, t, *J* = 7.0 Hz, OCH<sub>2</sub>CH<sub>3</sub>); <sup>13</sup>C NMR (CDCl<sub>3</sub>, DEPT-135) δ 160.4 (C, O-C=O), 142.4 (C), 140.3 (C), 134.3 (C), 131.4 (2 x CH), 127.5 (CH), 127.2 (2 x CH), 125.6 (CH), 110.1 (CH<sub>2</sub>), 61.3 (CH<sub>2</sub>, OCH<sub>2</sub>CH<sub>3</sub>), 14.2 (CH<sub>3</sub>, OCH<sub>2</sub>CH<sub>3</sub>).

**Ethyl 4-methyl-1-(1-phenylvinyl)-1H-benzo[d][1,2,3]triazole-5-carboxylate-carboxylate (11):** Prepared following the procedure **B** and purified by column chromatography using

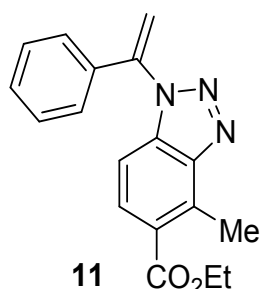

EtOAc/hexane (0.5:9.5 to 2:8) and was isolated as a white solid; Yield: 68% (104 mg); Mp.: 110-112 °C; IR (Neat): *v*<sub>max</sub> 2920, 2851, 1698, 1629, 1477, 1377, 1262, 1224, 1040, 899, 770, 594, 595, 696 and 595 cm<sup>-1</sup>; <sup>1</sup>H NMR (500 MHz, CDCl<sub>3</sub>) δ 7.95 (1H, d, *J* = 9.0 Hz), 7.43 (1H, tt, *J* = 7.0, 2.0 Hz), 7.38 (2H, tt, *J* = 7.0, 2.0 Hz), 7.28 (2H, td, *J* = 7.0, 2.0 Hz), 6.85 (1H, dd, *J* = 9.0, 0.5 Hz), 5.83 (1H, d, *J* = 1.0 Hz, olefinic-*H*), 5.80 (1H, d, *J* = 1.0 Hz, olefinic-*H*), 4.41 (2H, q, *J* = 7.0 Hz, OCH<sub>2</sub>CH<sub>3</sub>), 3.16 (3H, s, Ar-CH<sub>3</sub>), 1.42 (3H, t, *J* = 7.0 Hz, OCH<sub>2</sub>CH<sub>3</sub>); <sup>13</sup>C NMR (CDCl<sub>3</sub>, DEPT-135) δ 167.0 (C, O-C=O), 147.0 (C), 142.4 (C), 135.6 (C), 134.3 (C), 134.0 (C), 129.9 (CH), 129.8 (CH), 128.8 (2 x CH), 126.8 (2 x CH), 125.0 (C), 111.4 (CH<sub>2</sub>), 108.0 (CH), 61.0 (CH<sub>2</sub>, OCH<sub>2</sub>CH<sub>3</sub>), 15.3 (CH<sub>3</sub>), 14.3 (CH<sub>3</sub>, OCH<sub>2</sub>CH<sub>3</sub>); HRMS (ESI-TOF) *m/z* 308.1396 (M + H<sup>+</sup>), calcd for C<sub>18</sub>H<sub>17</sub>N<sub>3</sub>O<sub>2</sub>H 308.1399.

**Ethyl 4-methyl-1-(1-phenylethyl)-1H-benzo[d][1,2,3]triazole-5-carboxylate (12):**

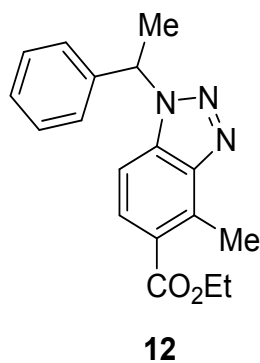

Prepared following the procedure **C** and purified by column chromatography using EtOAc/hexane (0.5:9.5 to 2:8) and was isolated as a colourless liquid; Yield: 72% (112 mg); IR (Neat): *v*<sub>max</sub> 2925, 1709, 1600, 1494, 1449, 1376, 1288, 1264, 1233, 1185, 1130, 1051, 730, 699 and 532 cm<sup>-1</sup>; <sup>1</sup>H NMR (500 MHz, CDCl<sub>3</sub>) δ 7.91 (1H, d, *J* = 8.5 Hz), 7.34-7.26 (5H, m), 7.05 (1H, d, *J* = 9.0 Hz), 6.04 (1H, q, *J* = 7.0 Hz), 4.38 (2H, q, *J* = 7.0 Hz, OCH<sub>2</sub>CH<sub>3</sub>), 3.11 (3H, s, OCH<sub>2</sub>CH<sub>3</sub>),

2.17 (3H, d,  $J = 7.0$  Hz), 1.40 (3H, t,  $J = 7.0$  Hz,  $\text{CH}_2\text{CH}_2\text{CH}_3$ );  $^{13}\text{C}$  NMR ( $\text{CDCl}_3$ , DEPT-135)  $\delta$  167.2 (C, O-C=O), 147.4 (C), 139.9 (C), 135.5 (C), 133.5 (C), 129.2 (CH), 128.9 (2 x CH), 128.3 (CH), 126.2 (2 x CH), 124.7 (C), 106.9 (CH), 60.9 ( $\text{CH}_2$ ,  $\text{OCH}_2\text{CH}_3$ ), 59.2 (CH), 21.0 ( $\text{CH}_3$ ), 15.2 ( $\text{CH}_3$ ), 14.3 ( $\text{CH}_3$ ,  $\text{OCH}_2\text{CH}_3$ ); HRMS (ESI-TOF)  $m/z$  332.1375 ( $\text{M} + \text{Na}^+$ ), calcd for  $\text{C}_{18}\text{H}_{19}\text{N}_3\text{O}_2\text{Na}$  332.1375.

## References:

1. D. B. Ramachary, K. Ramakumar, V. V. Narayana, *J. Org. Chem.*, **2007**, 72, 1458-1463.
2. I. Freifeld, G. Bose, T. Eckardt, P. Langer, *Eur. J. Org. Chem.*, **2007**, 351-355.
3. S. Cao, Y. Liu, C. Hu, C. Wen, and J.-P. Wan, *ChemCatChem.*, **2018**, 10, 5007-5011.
4. S. Wang, L. -J. Yang, J. -L. Zeng, Y. Zheng, J. -A. Ma, *Org. Chem. Front.*, **2015**, 2, 1468-1474.
