# Supplementary material for: Organocatalytic enone-azide [3 + 2]-cycloaddition: synthesis of functionally rich C/N-double vinyl 1,2,3-triazoles
Source: Royal Society of Chemistry journal article supplement (doi:10.1039/d0ob00848f), 2020-01-01
Supplement: d0ob00848f3.pdf [file d0ob00848f3.pdf]

## Supporting Information-III [Racemic and Chiral HPLC Spectrums]

# Organocatalytic Enone-Azide [3+2]-Cycloaddition: Synthesis of Functionally Rich C/N-Double Vinyl 1,2,3-Triazoles

**G. Surendra Reddy, A. Suresh Kumar, and Dhevalapally B. Ramachary\***

*Catalysis Laboratory, School of Chemistry, University of Hyderabad, Central University,  
Prof CR Rao Road, Gachibowli, Hyderabad-500 046, Telangana, India*  
E-mail: [ramsc@uohyd.ac.in](mailto:ramsc@uohyd.ac.in) and [ramchary.db@gmail.com](mailto:ramchary.db@gmail.com)

The enantiomeric excess (*ee*) of the chiral enone (-)-**1d** and chiral click products (+)-**4da** and (+)-**7da** was determined by chiral stationary phase HPLC using a Daicel Chiralpak AD-H or Daicel Chiralpak IB-3 or Daicel Chiralcel OJ-H column and using hexane/2-propanol as the eluent. Retention times and solvent ratios are indicated in the respective entries.

Racemic ( $\pm$ )-**1d**:

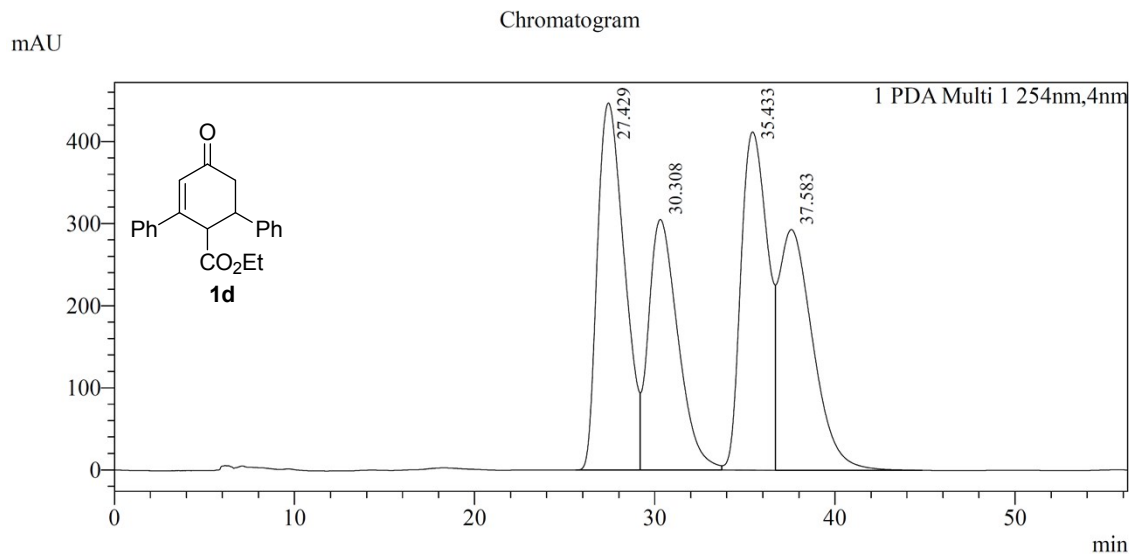

Chiralpak AD-H, Hexane/i-PrOH = 95:05, Flow Rate 0.5 mL/Min, 254 nm

Peak Table

| PDA Ch1 254nm |           |           |           |         |         |         |  |
|---------------|-----------|-----------|-----------|---------|---------|---------|--|
| Peak#         | Name      | Ret. Time | Area      | Height  | Area%   | Height% |  |
| 1             | RT:27.429 | 27.429    | 46556681  | 446974  | 28.632  | 30.676  |  |
| 2             | RT:30.308 | 30.308    | 34876637  | 305135  | 21.449  | 20.942  |  |
| 3             | RT:35.433 | 35.433    | 42545827  | 411903  | 26.166  | 28.269  |  |
| 4             | RT:37.583 | 37.583    | 38623564  | 293068  | 23.753  | 20.113  |  |
| Total         |           |           | 162602709 | 1457079 | 100.000 | 100.000 |  |

Chiral (-)-**1d** (92% *ee* major; 86.6% *ee* minor and 27% *de*):

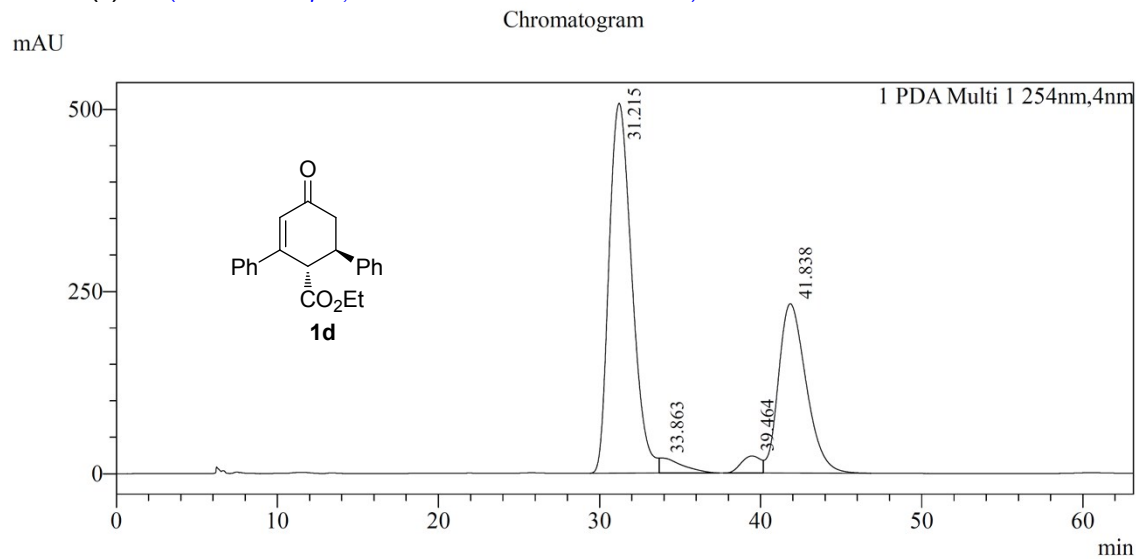

Chiralpak AD-H, Hexane/i-PrOH = 95:05, Flow Rate 0.5 mL/Min, 254 nm

Peak Table

| PDA Ch1 254nm |           |           |          |        |         |         |  |
|---------------|-----------|-----------|----------|--------|---------|---------|--|
| Peak#         | Name      | Ret. Time | Area     | Height | Area%   | Height% |  |
| 1             | RT:31.215 | 31.215    | 49974848 | 507528 | 61.100  | 64.727  |  |
| 2             | RT:33.863 | 33.863    | 1996070  | 20577  | 2.440   | 2.624   |  |
| 3             | RT:39.464 | 39.464    | 1975269  | 23463  | 2.415   | 2.992   |  |
| 4             | RT:41.838 | 41.838    | 27846173 | 232535 | 34.045  | 29.656  |  |
| Total         |           |           | 81792361 | 784102 | 100.000 | 100.000 |  |

Racemic ( $\pm$ )-4da:

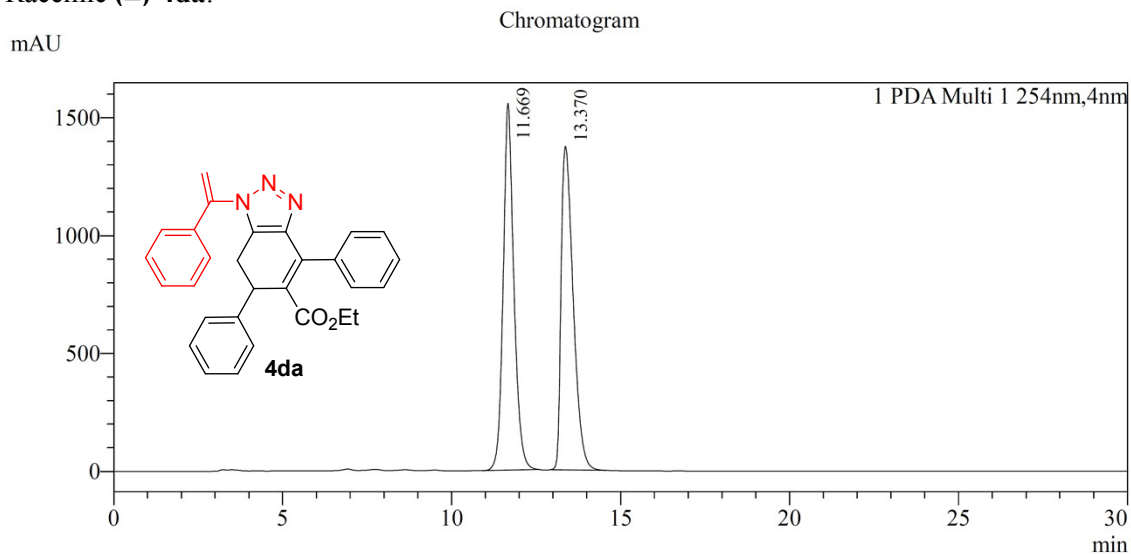

Chiralpak IB-3, Hexane/i-PrOH = 90:10, Flow Rate 1.0 mL/Min, 254 nm

Peak Table

| PDA Ch1 254nm |           |           |          |         |         |         |
|---------------|-----------|-----------|----------|---------|---------|---------|
| Peak#         | Name      | Ret. Time | Area     | Height  | Area%   | Height% |
| 1             | RT:11.669 | 11.669    | 34236063 | 1556478 | 50.113  | 53.151  |
| 2             | RT:13.370 | 13.370    | 34081999 | 1371906 | 49.887  | 46.849  |
| Total         |           |           | 68318062 | 2928384 | 100.000 | 100.000 |

Chiral (+)-4da (89.9% ee):

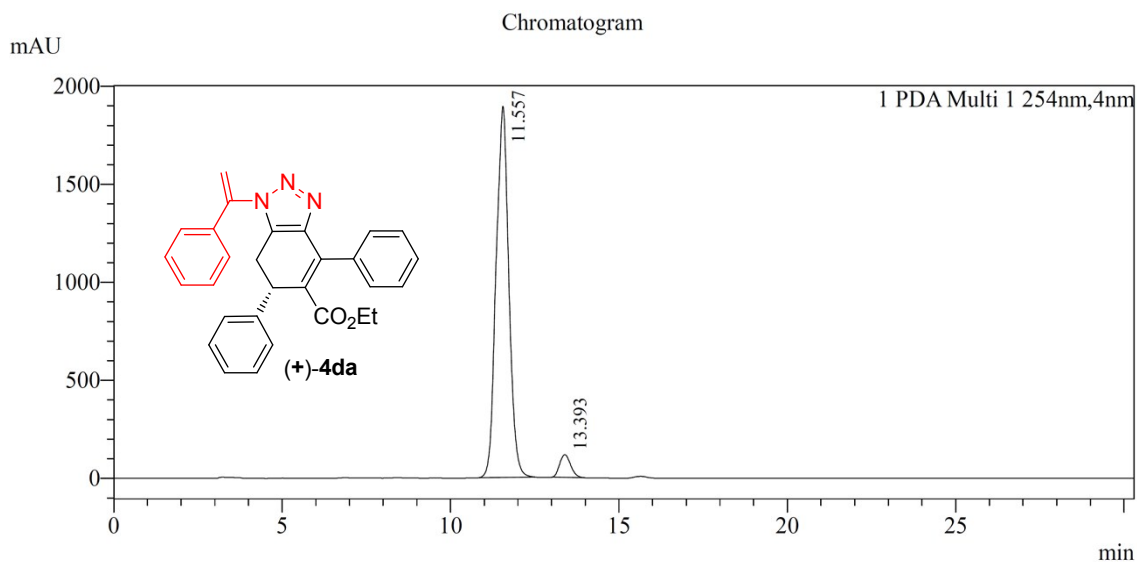

Chiralpak IB-3, Hexane/i-PrOH = 90:10, Flow Rate 1.0 mL/Min, 254 nm

Peak Table

| PDA Ch1 254nm |           |           |          |         |         |         |
|---------------|-----------|-----------|----------|---------|---------|---------|
| Peak#         | Name      | Ret. Time | Area     | Height  | Area%   | Height% |
| 1             | RT:11.557 | 11.557    | 49730629 | 1892017 | 94.961  | 94.233  |
| 2             | RT:13.393 | 13.393    | 2638744  | 115787  | 5.039   | 5.767   |
| Total         |           |           | 52369373 | 2007805 | 100.000 | 100.000 |

Racemic ( $\pm$ )-7da:

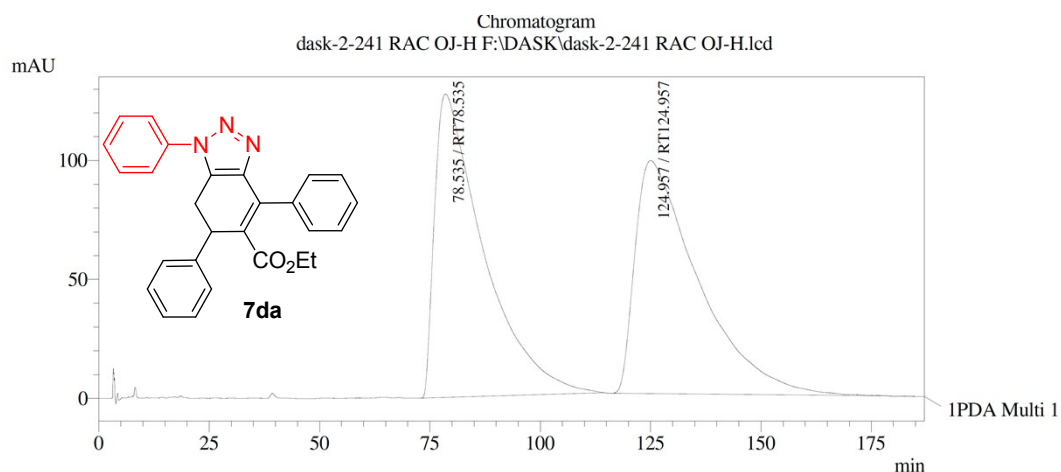

Chiralpak OJ-H, Hexane/i-PrOH = 90:10, Flow Rate 1.0 mL/Min, 254 nm

PeakTable

PDA Ch1 254nm 4nm

| Peak# | Name      | Ret. Time | Area      | Height | Area %  | Height % |
|-------|-----------|-----------|-----------|--------|---------|----------|
| 1     | RT78.535  | 78.535    | 98125466  | 127506 | 50.211  | 56.560   |
| 2     | RT124.957 | 124.957   | 97301589  | 97927  | 49.789  | 43.440   |
| Total |           |           | 195427054 | 225433 | 100.000 | 100.000  |

Chiral (+)-7da (89.6% ee):

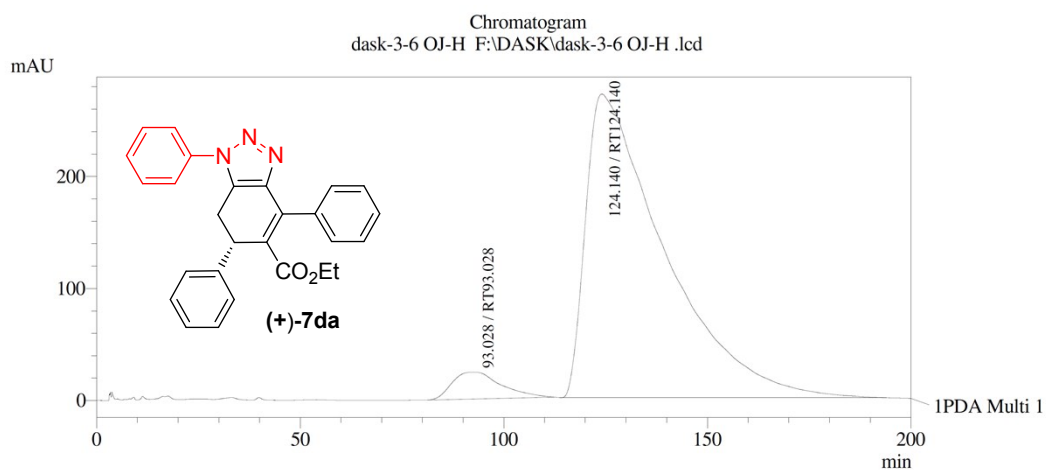

Chiralpak OJ-H, Hexane/i-PrOH = 90:10, Flow Rate 1.0 mL/Min, 254 nm

PeakTable

PDA Ch1 254nm 4nm

| Peak# | Name      | Ret. Time | Area      | Height | Area %  | Height % |
|-------|-----------|-----------|-----------|--------|---------|----------|
| 1     | RT93.028  | 93.028    | 19872292  | 23764  | 5.181   | 8.062    |
| 2     | RT124.140 | 124.140   | 363704549 | 271017 | 94.819  | 91.938   |
| Total |           |           | 383576841 | 294781 | 100.000 | 100.000  |
